# Supplementary material
Source: publisher site journal article supplement (https://www.spandidos-publications.com/2630/downloadSupplementary)
Supplement: Supplementary file 1 [file downloadSupplementary]

## Sheet: Table S7 DDX41_vs_Ctrl_NIR_RAS_
Table SVII. DDX41_vs_Ctrl_NIR_RAS_.
X.ID	Chr	Ass1	Ass2	Strand	Mss1	Mss2	Type	Isoform	KorN	Ctrl_1st.Ratio	Ctrl_1st.Alt_average_sj	Ctrl_1st.Model_average_sj	Ctrl_1st.Alt_sj	Ctrl_1st.Model_sj	Ctrl_1st.isfiltered	Ctrl_2nd.Ratio	Ctrl_2nd.Alt_average_sj	Ctrl_2nd.Model_average_sj	Ctrl_2nd.Alt_sj	Ctrl_2nd.Model_sj	Ctrl_2nd.isfiltered	DDX41_1st.Ratio	DDX41_1st.Alt_average_sj	DDX41_1st.Model_average_sj	DDX41_1st.Alt_sj	DDX41_1st.Model_sj	DDX41_1st.isfiltered	DDX41_2nd.Ratio	DDX41_2nd.Alt_average_sj	DDX41_2nd.Model_average_sj	DDX41_2nd.Alt_sj	DDX41_2nd.Model_sj	DDX41_2nd.isfiltered	P-value	T-value	DiffType	Gene	Symbol	Chr	GeneType	Description
known_NIR_86	chr1	109689325;109690564	109690271;109693206	+	109689325	109693206	cassetteExon	ENST00000369819.2	known	0.93	252	18	253;251	18	y	0.94	253.5	15	225;282	15	y	0.97	299	8	289;309	8	y	0.98	280	7	282;278	7	y	0.0298575	5.65685	up	ENSG00000134184.12	GSTM1	chr1	protein_coding	glutathione S-transferase mu 1
known_NIR_126	chr1	112705123	112707078	-	112705168	112707078	A3SS	ENST00000339083.11	known	0.16	15	76	15	76	y	0.15	6	33	6	33	y	0.09	4	43	4	43	y	0.1	9	81	9	81	y	0.0136061	-8.48528	down	ENSG00000155366.16	RHOC	chr1	protein_coding	ras homolog family member C
known_NIR_130	chr1	11274060	11294873	+	11274060	11285644	3pMXE	ENST00000376810.5	known	0.02	1	55	1	55	n	0	0	39	0	39	n	0.16	7	38	7	38	y	0.19	11	48	11	48	y	0.0178144	9.15255	up	ENSG00000120942.13	UBIAD1	chr1	protein_coding	UbiA prenyltransferase domain containing 1
known_NIR_374	chr1	149058215	149062093	-	149061383	149062093	A3SS&ES	ENST00000613595.4	known	0.66	173	89	173	89	y	0.67	174	85	174	85	y	0.59	151	104	151	104	y	0.58	146	107	146	107	y	0.00772212	-11.3137	down	ENSG00000269713.7	NBPF9	chr1	protein_coding	neuroblastoma breakpoint family, member 9
known_NIR_428	chr1	149935705	149936154	-	149935620	149936154	A3SS	ENST00000369140.7	known	0.97	31	1	31	1	n	1	14	0	14	0	n	0.81	21	5	21	5	y	0.85	45	8	45	8	y	0.0299646	-6.2	down	ENSG00000014914.19	MTMR11	chr1	protein_coding	myotubularin related protein 11
known_NIR_892	chr1	167951861;167966721	167966629;167974830	+	167951861	167974830	cassetteExon	ENST00000432587.6	known	1	169.5	0	128;211	0	n	0.99	142	1	125;159	1	n	0.95	185	9	154;216	9	y	0.96	165.5	7	145;186	7	y	0.0298575	-5.65685	down	ENSG00000143164.15	DCAF6	chr1	protein_coding	DDB1 and CUL4 associated factor 6
known_NIR_967	chr1	17632466	17634835	+	17632466;17634562	17634548;17634835	ES	ENST00000361221.7	known	0.21	17	63	17	64;62	y	0.2	9	35	9	35;35	y	0.15	11	61.5	11	58;65	y	0.14	3	18	3	18;18	y	0.0136061	-8.48528	down	ENSG00000074964.16	ARHGEF10L	chr1	protein_coding	Rho guanine nucleotide exchange factor (GEF) 10-like
known_NIR_1081	chr1	205772567	205775273	-	205772567;205775086	205774833;205775273	ES	ENST00000367139.7	known	0.35	20	37.5	20	70;5	y	0.32	15	32.5	15	52;13	y	0	0	36.5	0	57;16	n	0.04	2	47	2	70;24	y	0.00824229	-12.6	down	ENSG00000117280.12	RAB29	chr1	protein_coding	RAB29, member RAS oncogene family
known_NIR_1102	chr1	20776005	20776597	-	20773610	20776597	A3SS	ENST00000312239.9	known	0.19	134	561	134	561	y	0.17	103	502	103	502	y	0.26	182	528	182	528	y	0.25	182	539	182	539	y	0.0445338	6.7082	up	ENSG00000127483.17	HP1BP3	chr1	protein_coding	heterochromatin protein 1, binding protein 3
known_NIR_1149	chr1	213008466	213015613	-	213008466	213013093	5pMXE	ENST00000621746.1	known	0.16	7	36	7	36	y	0.13	8	53	8	53	y	0.06	4	67	4	67	y	0.04	2	55	2	55	y	0.0454248	-5.26965	down	ENSG00000174606.12	ANGEL2	chr1	protein_coding	angel homolog 2 (Drosophila)
known_NIR_1155	chr1	213072986	213077696	+	213051509	213077696	A5SS	ENST00000366959.4	known	0.5	1	1	1	1	n	0.6	6	4	6	4	y	0.13	2	13	2	13	y	0	0	4	0	4	n	0.031749	-5.91419	down	ENSG00000136643.11	RPS6KC1	chr1	protein_coding	ribosomal protein S6 kinase, 52kDa, polypeptide 1
known_NIR_1196	chr1	222713416	222715684	+	222712942	222715684	A5SS	ENST00000340934.9	known	0.35	42	78	42	78	y	0.32	45	97	45	97	y	0.18	19	87	19	87	y	0.15	18	99	18	99	y	0.0152164	-8.01388	down	ENSG00000162819.11	BROX	chr1	protein_coding	BRO1 domain and CAAX motif containing
known_NIR_1334	chr1	23808323	23810736	-	23808323	23816675	A5SS	ENST00000436439.6	known	1	41	0	41	0	n	0.97	37	1	37	1	n	0.72	36	14	36	14	y	0.77	34	10	34	10	y	0.0252224	-8.23193	down	ENSG00000117305.14	HMGCL	chr1	protein_coding	3-hydroxymethyl-3-methylglutaryl-CoA lyase
known_NIR_1354	chr1	243172846	243186259	-	243172846;243186072	243185779;243186259	ES	ENST00000366542.5	known	0.21	42	154	42	130;178	y	0.2	54	212	54	231;193	y	0.25	57	170.5	57	192;149	y	0.24	54	173.5	54	171;176	y	0.0298575	5.65685	up	ENSG00000143702.15	CEP170	chr1	protein_coding	centrosomal protein 170kDa
known_NIR_1406	chr1	26286037;26301024	26300926;26301694	-	26286037;26298062	26294205;26301694	MXE	ENST00000357089.8	known	0.23	30.5	101.5	2;59	144;59	y	0.22	27.5	96.5	4;51	115;78	y	0.15	16	91.5	0;32	124;59	n	0.13	15	99.5	1;29	132;67	n	0.037184	-7.60263	down	ENSG00000158062.20	UBXN11	chr1	protein_coding	UBX domain protein 11
known_NIR_1527	chr1	35030713	35031815	-	35030713	35031631	5pMXE	ENST00000487874.1	known	0.58	41	30	41	30	y	0.51	30	29	30	29	y	0.83	69	14	69	14	y	0.76	39	12	39	12	y	0.037036	5.05076	up	ENSG00000271741.1	RP11-244H3.4	chr1	protein_coding		--
known_NIR_1533	chr1	35973511	36004341	+	35973511	35982621	3pMXE	ENST00000324350.9	known	0.86	43	7	43	7	y	0.83	30	6	30	6	y	0.64	28	16	28	16	y	0.61	14	9	14	9	y	0.00916983	-10.3709	down	ENSG00000126070.18	AGO3	chr1	protein_coding	argonaute RISC catalytic component 3
known_NIR_1660	chr1	43975107	43976090	+	43975107;43975848	43975800;43976090	ES	ENST00000472174.6	known	0.12	54	394	54	396;392	y	0.11	42	335	42	331;339	y	0.05	20	386	20	396;376	y	0.06	24	387	24	393;381	y	0.0136061	-8.48528	down	ENSG00000117410.13	ATP6V0B	chr1	protein_coding	ATPase, H+ transporting, lysosomal 21kDa, V0 subunit b
known_NIR_1751	chr1	53228954	53235577	-	53228954;53233652	53233542;53235577	ES	ENST00000371470.7	known	0.29	193	476	193	365;587	y	0.28	171	444.5	171	288;601	y	0.32	192	411.5	192	313;510	y	0.33	218	444	218	354;534	y	0.0298575	5.65685	up	ENSG00000162385.10	MAGOH	chr1	protein_coding	mago-nashi homolog, proliferation-associated (Drosophila)
known_NIR_1827	chr1	68159247	68232194	-	68194227	68232194	3pMXE	ENST00000370971.1	known	0	0	176	0	176	n	0.02	3	173	3	173	y	0.09	20	208	20	208	y	0.07	13	162	13	162	y	0.0384761	4.94975	up	ENSG00000116729.13	WLS	chr1	protein_coding	wntless Wnt ligand secretion mediator
known_NIR_1881	chr1	84202805	84204479	+	84202805	84214153	A3SS	ENST00000370689.6	known	0.1	7	65	7	65	y	0.13	6	41	6	41	y	0.03	1	33	1	33	n	0	0	57	0	57	n	0.0421737	-4.71405	down	ENSG00000142875.19	PRKACB	chr1	protein_coding	protein kinase, cAMP-dependent, catalytic, beta
known_NIR_2061	chr10	113146097	113150983	+	113146097	113150998	A3SS	ENST00000355717.8	known	0.24	18	57	18	57	y	0.21	16	59	16	59	y	0.07	8	104	8	104	y	0.11	13	107	13	107	y	0.0383286	-5.4	down	ENSG00000148737.15	TCF7L2	chr10	protein_coding	transcription factor 7-like 2 (T-cell specific, HMG-box)
known_NIR_2303	chr10	35195214	35206895	+	35188388	35206895	A5SS	ENST00000345491.7	known	0.86	206	34	206	34	y	0.85	207	36	207	36	y	0.92	199	17	199	17	y	0.93	221	16	221	16	y	0.0100505	9.89949	up	ENSG00000095794.19	CREM	chr10	protein_coding	cAMP responsive element modulator
known_NIR_2751	chr11	119168921	119171356	+	119168894	119171356	A5SS	ENST00000409991.5	known	0.28	5	13	5	13	y	0.23	7	24	7	24	y	0.62	8	5	8	5	y	0.57	4	3	4	3	n	0.0106409	9.61665	up	ENSG00000160703.15	NLRX1	chr11	protein_coding	NLR family member X1
known_NIR_2774	chr11	122904444	122905172	+	122904444	122924897	A3SS	ENST00000227349.6	known	0.04	1	24	1	24	n	0	0	10	0	10	n	0.21	5	19	5	19	y	0.23	6	20	6	20	y	0.0293856	8.94427	up	ENSG00000109944.10	C11orf63	chr11	protein_coding	chromosome 11 open reading frame 63
known_NIR_2811	chr11	125655347	125656206	+	125655347	125675928	A3SS	ENST00000428830.6	known	0.82	50	11	50	11	y	0.79	68	18	68	18	y	0.55	39	32	39	32	y	0.56	45	36	45	36	y	0.0232194	-15.8114	down	ENSG00000149554.12	CHEK1	chr11	protein_coding	checkpoint kinase 1
known_NIR_2852	chr11	130234273	130236793	-	130234273	130237010	A5SS	ENST00000525842.5	known	0.5	151	149	151	149	y	0.49	144	151	144	151	y	0.53	156	138	156	138	y	0.54	161	138	161	138	y	0.0298575	5.65685	up	ENSG00000196323.11	ZBTB44	chr11	protein_coding	zinc finger and BTB domain containing 44
known_NIR_3279	chr11	61781824	61783513	+	61781824	61783498	A3SS	ENST00000278836.9	known	0.79	76	20	76	20	y	0.76	77	24	77	24	y	0.92	80	7	80	7	y	0.89	112	14	112	14	y	0.0256088	6.12826	up	ENSG00000124920.13	MYRF	chr11	protein_coding	myelin regulatory factor
known_NIR_3389	chr11	64288468	64289037	+	64288468	64288603	A3SS&ES	ENST00000411458.5	known	0.09	10	98	10	98	y	0.06	5	79	5	79	y	0.24	22	69	22	69	y	0.25	20	61	20	61	y	0.0370749	10.7517	up	ENSG00000173264.13	GPR137	chr11	protein_coding	G protein-coupled receptor 137
known_NIR_3777	chr11	77907810	77910970	-	77907810	77918821	A5SS	ENST00000534064.5	known	0.08	7	80	7	80	y	0.12	11	81	11	81	y	0.38	36	59	36	59	y	0.4	22	33	22	33	y	0.0170999	12.9692	up	ENSG00000149262.16	INTS4	chr11	protein_coding	integrator complex subunit 4
known_NIR_3879	chr11	904859;908645	908542;910775	-	904859	910775	cassetteExon	ENST00000323578.12	known	0.46	52.5	61	77;28	61	y	0.48	41	44	58;24	44	y	0.61	43.5	28	62;25	28	y	0.6	57.5	39	81;34	39	y	0.0189814	12.0748	up	ENSG00000177830.17	CHID1	chr11	protein_coding	chitinase domain containing 1
known_NIR_3949	chr12	102195447	102195951	+	102165883	102195951	A5SS	ENST00000543784.5	known	0.38	30	50	30	50	y	0.35	30	55	30	55	y	0.6	59	40	59	40	y	0.64	43	24	43	24	y	0.0121461	10.2	up	ENSG00000185480.11	PARPBP	chr12	protein_coding	PARP1 binding protein
known_NIR_3966	chr12	104287346;104289040	104288931;104311290	+	104287346	104311290	cassetteExon	ENST00000354940.10	known	0.93	740	54	246;1234	54	y	0.95	704	40	223;1185	40	y	0.88	759	104	228;1290	104	y	0.86	772	124	292;1252	124	y	0.0384761	-4.94975	down	ENSG00000198431.15	TXNRD1	chr12	protein_coding	thioredoxin reductase 1
known_NIR_3991	chr12	106956065	106967111	+	106957149	106967111	5pMXE	ENST00000547081.1	known	0.33	51	103	51	103	y	0.39	73	114	73	114	y	0.58	87	62	87	62	y	0.53	89	80	89	80	y	0.0403689	4.99344	up	ENSG00000151135.9	TMEM263	chr12	protein_coding	transmembrane protein 263
known_NIR_4128	chr12	121011146	121012430	-	121011146	121016330	A5SS	ENST00000288757.7	known	0.13	11	74	11	74	y	0.12	9	69	9	69	y	0.02	2	82	2	82	y	0	0	50	0	50	n	0.0239816	-10.2859	down	ENSG00000157895.11	C12orf43	chr12	protein_coding	chromosome 12 open reading frame 43
known_NIR_4199	chr12	122980887	122981129	+	122980745	122981129	A5SS	ENST00000315580.9	known	0.03	5	161	5	161	y	0.02	3	136	3	136	y	0.07	11	139	11	139	y	0.06	10	151	10	151	y	0.0298575	5.65685	up	ENSG00000182196.13	ARL6IP4	chr12	protein_coding	ADP-ribosylation factor-like 6 interacting protein 4
known_NIR_4345	chr12	285662;286207	286126;292759	-	285662	292759	cassetteExon	ENST00000399788.6	known	0.09	11	114	18;4	114	y	0.1	17.5	154	28;7	154	y	0.05	8.5	155	13;4	155	y	0.06	10	171	14;6	171	y	0.0298575	-5.65685	down	ENSG00000073614.11	KDM5A	chr12	protein_coding	lysine (K)-specific demethylase 5A
known_NIR_4466	chr12	48655060	48660468	-	48655060	48660366	A5SS	ENST00000550347.5	known	0.05	4	75	4	75	y	0.03	3	111	3	111	y	0.12	21	148	21	148	y	0.15	20	115	20	115	y	0.0454248	5.26965	up	ENSG00000139620.12	KANSL2	chr12	protein_coding	KAT8 regulatory NSL complex subunit 2
known_NIR_4522	chr12	50192564	50195830	-	50192561	50195830	A3SS	ENST00000552491.5	known	0.09	56	597	56	597	y	0.1	59	545	59	545	y	0.24	151	491	151	491	y	0.22	150	517	150	517	y	0.0189814	12.0748	up	ENSG00000050405.13	LIMA1	chr12	protein_coding	LIM domain and actin binding 1
known_NIR_4622	chr12	53984154	53984964	-	53984154	53984710	5pMXE	ENST00000513165.1	known	0.52	12	11	12	11	y	0.55	12	10	12	10	y	0.27	8	22	8	22	y	0.32	7	15	7	15	y	0.0252224	-8.23193	down	ENSG00000251151.2	HOXC-AS3	chr12	processed_transcript	HOXC cluster antisense RNA 3
known_NIR_4676	chr12	55932255	55936423	+	55931344	55936423	A5SS	ENST00000331886.9	known	0.22	5	18	5	18	y	0.21	5	19	5	19	y	0.53	19	17	19	17	y	0.52	31	29	31	29	y	0.000519886	43.8406	up	ENSG00000065357.19	DGKA	chr12	protein_coding	diacylglycerol kinase, alpha 80kDa
known_NIR_4982	chr12	79805768	79807226	-	79805768;79806333	79806166;79807226	ES	ENST00000261207.9	known	0.29	46	115	46	115;115	y	0.27	50	138	50	104;172	y	0.19	35	149	35	112;186	y	0.21	45	170.5	45	169;172	y	0.0298575	-5.65685	down	ENSG00000058272.15	PPP1R12A	chr12	protein_coding	protein phosphatase 1, regulatory subunit 12A
known_NIR_5148	chr13	31141259	31145563	-	31141259;31143923	31143792;31145563	ES	ENST00000445273.6	known	0.03	22	632	22	529;735	y	0.02	12	626.5	12	586;667	y	0.13	95	652	95	563;741	y	0.15	118	693.5	118	647;740	y	0.0239816	10.2859	up	ENSG00000120694.19	HSPH1	chr13	protein_coding	heat shock 105kDa/110kDa protein 1
known_NIR_5241	chr13	52153992	52156075	-	52153992;52154173	52154080;52156075	ES	ENST00000620675.4	known	0.2	6	24.5	6	23;26	y	0.19	3	13	3	12;14	y	0.09	2	19.5	2	20;19	y	0.08	1	12	1	15;9	n	0.00410679	-15.5563	down	ENSG00000136098.16	NEK3	chr13	protein_coding	NIMA-related kinase 3
known_NIR_5385	chr14	104865513;104868555	104868424;104876256	+	104865513	104876256	cassetteExon	ENST00000556508.5	known	0.92	47	4	35;59	4	y	0.95	60.5	3	41;80	3	y	0.82	46.5	10	29;64	10	y	0.84	38	7	21;55	7	y	0.0384207	-5.82435	down	ENSG00000099814.15	CEP170B	chr14	protein_coding	centrosomal protein 170B
known_NIR_5532	chr14	24440926	24442098	-	24440926	24442178	A5SS	ENST00000538105.6	known	0.55	6	5	6	5	y	0.56	10	8	10	8	y	0	0	7	0	7	n	0.06	1	16	1	16	n	0.0318181	-17.2619	down	ENSG00000100445.16	SDR39U1	chr14	protein_coding	short chain dehydrogenase/reductase family 39U, member 1
known_NIR_5664	chr14	58291707;58293138	58293066;58297955	-	58291707;58295811	58293766;58297955	MXE	ENST00000557660.5	known	0.54	10	8.5	9;11	4;13	y	0.56	4.5	3.5	4;5	0;7	n	0.25	4	12	6;2	6;18	y	0.23	2.5	8.5	4;1	5;12	n	0.00207469	-21.9203	down	ENSG00000257621.7	PSMA3-AS1	chr14	antisense	PSMA3 antisense RNA 1
known_NIR_5666	chr14	58295811	58297955	-	58293138	58297955	A3SS	ENST00000555037.1	known	0.54	13	11	13	11	y	0.58	7	5	7	5	y	0.9	18	2	18	2	y	0.92	12	1	12	1	n	0.012987	15.6525	up	ENSG00000257621.7	PSMA3-AS1	chr14	antisense	PSMA3 antisense RNA 1
known_NIR_5712	chr14	64738137	64738742	+	64738224	64738742	A5SS	ENST00000471182.6	known	0.31	19	43	19	43	y	0.34	10	19	10	19	y	0.04	2	43	2	43	y	0	0	27	0	27	n	0.00874585	-12.2	down	ENSG00000126822.15	PLEKHG3	chr14	protein_coding	pleckstrin homology domain containing, family G (with RhoGef domain) member 3
known_NIR_5747	chr14	68468250	68594485	+	68468250	68477648	3pMXE	ENST00000471583.5	known	0.05	2	35	2	35	y	0	0	9	0	9	n	0.22	7	25	7	25	y	0.29	2	5	2	5	n	0.0410296	5.34739	up	ENSG00000182185.18	RAD51B	chr14	protein_coding	RAD51 paralog B
known_NIR_5778	chr14	70995925	71009634	+	70978648	71009634	A5SS	ENST00000439984.7	known	0.72	21	8	21	8	y	0.74	26	9	26	9	y	0.44	18	23	18	23	y	0.47	19	21	19	21	y	0.00737727	-15.2543	down	ENSG00000100731.15	PCNX	chr14	protein_coding	pecanex homolog (Drosophila)
known_NIR_5788	chr14	73277293;73279424	73279281;73282359	-	73277293	73282359	cassetteExon	ENST00000554546.5	known	0.43	61	81	67;55	81	y	0.42	80	112	81;79	112	y	0.55	85	70	80;90	70	y	0.53	94.5	85	55;134	85	y	0.0239816	10.2859	up	ENSG00000133961.19	NUMB	chr14	protein_coding	numb homolog (Drosophila)
known_NIR_5968	chr15	22671607;22672465	22672307;22672690	+	22671607	22672690	cassetteExon	ENST00000611636.4	known	0	0	33	0;0	33	n	0.05	1.5	30	2;1	30	n	0.17	7.5	36	14;1	36	n	0.23	13	44	11;15	44	y	0.0491613	4.48129	up	ENSG00000276141.4	WHAMMP3	chr15	transcribed_unprocessed_pseudogene	WAS protein homolog associated with actin, golgi membranes and microtubules pseudogene 3
known_NIR_5998	chr15	28655420	28655796	+	28655420;28655691	28655495;28655796	ES	ENST00000529624.5	known	0.85	20	3.5	20	4;3	y	0.76	13	4	13	0;8	n	0.5	4	4	4	2;6	y	0.38	7	11.5	7	14;9	y	0.0460427	-4.86667	down	ENSG00000206149.10	HERC2P9	chr15	transcribed_unprocessed_pseudogene	hect domain and RLD 2 pseudogene 9
known_NIR_6165	chr15	50300902	50301221	-	50300902	50301257	A5SS	ENST00000380877.7	known	0.48	85	92	85	92	y	0.5	60	59	60	59	y	0.56	74	59	74	59	y	0.57	84	63	84	63	y	0.0445338	6.7082	up	ENSG00000104064.16	GABPB1	chr15	protein_coding	GA binding protein transcription factor, beta subunit 1
known_NIR_6206	chr15	57639545	57674968	+	57639545;57661533	57661450;57674968	ES	ENST00000380569.6	known	0.14	2	12.5	2	10;15	y	0.13	2	13.5	2	18;9	y	0.07	2	27.5	2	28;27	y	0.08	2	22	2	22;22	y	0.0136061	-8.48528	down	ENSG00000137878.16	GCOM1	chr15	protein_coding	GRINL1A complex locus 1
known_NIR_6244	chr15	63327233	63338819	-	63327233;63328130	63328098;63338819	ES	ENST00000178638.7	known	0.57	63	47.5	63	55;40	y	0.6	99	65.5	99	70;61	y	0.77	136	39.5	136	42;37	y	0.73	123	45	123	46;44	y	0.026784	6.6	up	ENSG00000074410.13	CA12	chr15	protein_coding	carbonic anhydrase XII
known_NIR_6550	chr15	90713299	90714921	-	90713299	90716981	A5SS	ENST00000559531.1	known	0.75	6	2	6	2	n	1	1	0	1	0	n	0.23	3	10	3	10	y	0	0	8	0	8	n	0.047086	-4.47446	down	ENSG00000259736.1	CRTC3-AS1	chr15	antisense	CRTC3 antisense RNA 1
known_NIR_6584	chr15	98924684	98929561	+	98924684	98929558	A3SS	ENST00000268035.10	known	0.45	130	162	130	162	y	0.47	177	198	177	198	y	0.36	172	310	172	310	y	0.35	152	278	152	278	y	0.0273751	-9.39149	down	ENSG00000140443.13	IGF1R	chr15	protein_coding	insulin-like growth factor 1 receptor
known_NIR_6784	chr16	2205512	2206031	+	2205512	2206061	A3SS	ENST00000564088.5	known	0.62	30	18	30	18	y	0.68	17	8	17	8	y	0.88	43	6	43	6	y	0.83	25	5	25	5	y	0.0368256	5.24951	up	ENSG00000167965.17	MLST8	chr16	protein_coding	MTOR associated protein, LST8 homolog (S. cerevisiae)
known_NIR_6974	chr16	3065494;3065687	3065621;3065784	+	3065494	3065784	cassetteExon	ENST00000325568.9	known	0.6	382.5	254	10;755	254	y	0.59	359.5	249	7;712	249	y	0.66	393.5	206	10;777	206	y	0.68	386.5	183	10;763	183	y	0.0445338	6.7082	up	ENSG00000008517.16	IL32	chr16	protein_coding	interleukin 32
known_NIR_6976	chr16	3065494;3065687	3065642;3065784	+	3065494	3065784	cassetteExon	ENST00000325568.9	known	0.6	377.5	254	0;755	254	n	0.59	359.5	249	7;712	249	y	0.66	392.5	206	8;777	206	y	0.68	381.5	183	0;763	183	n	0.0445338	6.7082	up	ENSG00000008517.16	IL32	chr16	protein_coding	interleukin 32
known_NIR_7244	chr16	66552793	66565886	+	66552793;66563217	66563122;66565886	ES	ENST00000351137.8	known	0.01	2	229.5	2	201;258	y	0.02	5	201.5	5	156;247	y	0.07	19	234.5	19	215;254	y	0.08	15	174.5	15	160;189	y	0.0136061	8.48528	up	ENSG00000217555.12	CKLF	chr16	protein_coding	chemokine-like factor
known_NIR_7322	chr16	69626528	69647028	+	69626528;69646578	69646517;69647028	ES	ENST00000349945.5	known	0.9	86	10	86	4;16	y	0.92	65	6	65	5;7	y	0.81	129	31	129	24;38	y	0.82	100	22	100	18;26	y	0.0316556	-8.49706	down	ENSG00000102908.20	NFAT5	chr16	protein_coding	nuclear factor of activated T-cells 5, tonicity-responsive
known_NIR_7595	chr17	15978163;15986892	15986800;15987266	-	15978163;15981144	15981040;15987266	MXE	ENST00000399277.5	known	0.38	16.5	27	2;31	33;21	y	0.34	12.5	24.5	3;22	30;19	y	0.16	6	32	0;12	36;28	n	0.13	4.5	30.5	9;0	37;24	n	0.0165861	-8.6	down	ENSG00000214941.7	ZSWIM7	chr17	protein_coding	zinc finger, SWIM-type containing 7
known_NIR_7669	chr17	18699275	18701357	+	18699275;18699457	18699360;18701357	ES	ENST00000572555.5	known	0.32	6	12.5	6	21;4	y	0.29	11	27.5	11	27;28	y	0	0	26	0	29;23	n	0.03	1	34	1	35;33	n	0.00530821	-13.6707	down	ENSG00000108448.20	TRIM16L	chr17	protein_coding	tripartite motif containing 16-like
known_NIR_7691	chr17	19343461	19343790	-	19337748	19343790	A3SS	ENST00000575403.5	known	1	81	0	81	0	n	0.99	80	1	80	1	n	0.95	40	2	40	2	y	0.96	52	2	52	2	y	0.0298575	-5.65685	down	ENSG00000108641.14	B9D1	chr17	protein_coding	B9 protein domain 1
known_NIR_7767	chr17	28766707	28812209	-	28766707	28842682	A5SS	ENST00000581407.5	known	0.4	18	27	18	27	y	0.45	22	27	22	27	y	0.62	25	15	25	15	y	0.69	35	16	35	16	y	0.0410296	5.34739	up	ENSG00000173065.13	FAM222B	chr17	protein_coding	family with sequence similarity 222, member B
known_NIR_7809	chr17	35002789	35002995	+	35002789	35004273	A3SS	ENST00000378526.8	known	0.1	11	98	11	98	y	0.12	10	75	10	75	y	0.02	1	63	1	63	n	0.04	5	123	5	123	y	0.0298575	-5.65685	down	ENSG00000005156.11	LIG3	chr17	protein_coding	ligase III, DNA, ATP-dependent
known_NIR_7908	chr17	39745788	39746109	+	39745788;39746000	39745913;39746109	ES	ENST00000309156.8	known	0.36	51	91.5	51	121;62	y	0.34	55	106.5	55	117;96	y	0.21	26	100.5	26	111;90	y	0.24	42	132	42	174;90	y	0.0286201	-6.93375	down	ENSG00000141738.13	GRB7	chr17	protein_coding	growth factor receptor-bound protein 7
known_NIR_7909	chr17	39906987	39908958	-	39906987;39908214	39908176;39908958	ES	ENST00000360317.7	known	0.4	1	1.5	1	3;0	n	0.21	2	7.5	2	15;0	n	1	5	0	5	0;0	n	0.85	17	3	17	2;4	y	0.0401656	5.12239	up	ENSG00000073605.18	GSDMB	chr17	protein_coding	gasdermin B
known_NIR_8169	chr17	5106533	5108926	-	5106506	5108926	A3SS	ENST00000575898.5	known	0.66	43	22	43	22	y	0.62	16	10	16	10	y	0.95	21	1	21	1	n	1	28	0	28	0	n	0.0105576	10.4636	up	ENSG00000167840.13	ZNF232	chr17	protein_coding	zinc finger protein 232
known_NIR_8241	chr17	59112345	59119299	-	59112345	59119319	A5SS	ENST00000330137.11	known	0.04	10	215	10	215	y	0.02	5	206	5	206	y	0.11	24	199	24	199	y	0.09	13	138	13	138	y	0.0384761	4.94975	up	ENSG00000182628.12	SKA2	chr17	protein_coding	spindle and kinetochore associated complex subunit 2
known_NIR_8450	chr17	75286802;75288461	75288388;75289354	-	75286802;75288591	75288502;75289354	MXE	ENST00000375261.8	known	0.84	40.5	8	53;28	14;2	y	0.83	53	11	83;23	17;5	y	0.72	26.5	10.5	39;14	14;7	y	0.7	22.5	9.5	36;9	13;6	y	0.0212375	-11.1803	down	ENSG00000125454.11	SLC25A19	chr17	protein_coding	solute carrier family 25 (mitochondrial thiamine pyrophosphate carrier), member 19
known_NIR_8453	chr17	75320553;75326020	75325898;75332700	-	75320553;75321827	75321659;75332700	MXE	ENST00000392563.5	known	0.45	178.5	215	0;357	427;3	n	0.43	165.5	221	5;326	442;0	n	0.52	175.5	162	0;351	324;0	n	0.5	216	212	2;430	420;4	y	0.0384761	4.94975	up	ENSG00000177885.13	GRB2	chr17	protein_coding	growth factor receptor-bound protein 2
known_NIR_8494	chr17	75923638	75925347	-	75923641	75925347	A3SS	ENST00000586717.5	known	0.31	8	18	8	18	y	0.35	11	20	11	20	y	0.57	32	24	32	24	y	0.62	18	11	18	11	y	0.0163929	8.27721	up	ENSG00000188878.16	FBF1	chr17	protein_coding	Fas (TNFRSF6) binding factor 1
known_NIR_8654	chr17	8174272	8174520	-	8174272	8175959	A5SS	ENST00000431792.2	known	1	17	0	17	0	n	0.94	15	1	15	1	n	0.68	19	9	19	9	y	0.7	21	9	21	9	y	0.0468821	-8.85438	down	ENSG00000179029.14	TMEM107	chr17	protein_coding	transmembrane protein 107
known_NIR_8658	chr17	8174272	8175959	-	8175857	8175959	A3SS	ENST00000532998.5	known	0	0	38	0	38	n	0.03	1	36	1	36	n	0.2	9	37	9	37	y	0.16	9	48	9	48	y	0.026784	6.6	up	ENSG00000179029.14	TMEM107	chr17	protein_coding	transmembrane protein 107
known_NIR_8724	chr17	82229106	82235983	+	82228545	82235983	A5SS	ENST00000392341.5	known	0.9	543	62	543	62	y	0.89	484	60	484	60	y	0.94	465	31	465	31	y	0.93	515	40	515	40	y	0.0298575	5.65685	up	ENSG00000141526.14	SLC16A3	chr17	protein_coding	solute carrier family 16 (monocarboxylate transporter), member 3
known_NIR_8840	chr18	32092886	32111754	+	32092886	32123518	A3SS	ENST00000257190.9	known	0.84	82	16	82	16	y	0.85	71	13	71	13	y	0.97	86	3	86	3	y	0.95	94	5	94	5	y	0.0239816	10.2859	up	ENSG00000134758.13	RNF138	chr18	protein_coding	ring finger protein 138, E3 ubiquitin protein ligase
known_NIR_8841	chr18	32113860	32123518	+	32092886	32123518	A5SS	ENST00000257190.9	known	0.84	85	16	85	16	y	0.86	83	13	83	13	y	0.98	133	3	133	3	y	0.95	106	5	106	5	y	0.0329611	6.37905	up	ENSG00000134758.13	RNF138	chr18	protein_coding	ring finger protein 138, E3 ubiquitin protein ligase
known_NIR_8974	chr18	58221757	58245427	+	58165861	58245427	A5SS	ENST00000356462.10	known	0.18	25	112	25	112	y	0.2	32	128	32	128	y	0.06	9	142	9	142	y	0.07	10	141	10	141	y	0.0212375	-11.1803	down	ENSG00000049759.16	NEDD4L	chr18	protein_coding	neural precursor cell expressed, developmentally down-regulated 4-like, E3 ubiquitin protein ligase
known_NIR_9167	chr19	12720990	12722477	-	12720990	12723249	A5SS	ENST00000425528.5	known	0.48	41	44	41	44	y	0.49	45	47	45	47	y	0.28	22	57	22	57	y	0.27	24	66	24	66	y	0.00113186	-29.6985	down	ENSG00000105576.15	TNPO2	chr19	protein_coding	transportin 2
known_NIR_9339	chr19	18572960	18573293	+	18572607	18573293	A5SS	ENST00000596273.5	known	0.41	209	295	209	295	y	0.4	164	250	164	250	y	0.36	184	322	184	322	y	0.35	190	351	190	351	y	0.0194193	-7.07107	down	ENSG00000221983.7	UBA52	chr19	protein_coding	ubiquitin A-52 residue ribosomal protein fusion product 1
known_NIR_9518	chr19	3452666	3456550	+	3452666;3453916	3453763;3456550	ES	ENST00000589123.5	known	0.35	73	133	73	143;123	y	0.34	63	124.5	63	145;104	y	0.45	72	89	72	94;84	y	0.44	85	107.5	85	132;83	y	0.00496281	14.1421	up	ENSG00000141905.17	NFIC	chr19	protein_coding	nuclear factor I/C (CCAAT-binding transcription factor)
known_NIR_9550	chr19	3534522	3534795	+	3534513	3534795	A5SS	ENST00000441788.6	known	0.11	13	107	13	107	y	0.1	13	114	13	114	y	0.05	7	143	7	143	y	0.04	6	141	6	141	y	0.0136061	-8.48528	down	ENSG00000105325.13	FZR1	chr19	protein_coding	fizzy/cell division cycle 20 related 1 (Drosophila)
known_NIR_9567	chr19	35631405	35633077	+	35631405	35633098	A3SS	ENST00000589559.5	known	0.01	2	153	2	153	y	0.02	2	131	2	131	y	0.05	9	159	9	159	y	0.06	8	119	8	119	y	0.0298575	5.65685	up	ENSG00000126254.11	RBM42	chr19	protein_coding	RNA binding motif protein 42
known_NIR_9578	chr19	35744421;35744692	35744626;35745125	-	35744421	35745125	cassetteExon	ENST00000378975.7	known	0.31	17	37	28;6	37	y	0.34	10.5	20	12;9	20	y	0.46	21.5	25	30;13	25	y	0.49	14.5	15	29;0	15	n	0.0194193	7.07107	up	ENSG00000161265.14	U2AF1L4	chr19	protein_coding	U2 small nuclear RNA auxiliary factor 1-like 4
known_NIR_9659	chr19	38304490	38304624	+	38304490	38304565	A3SS	ENST00000591889.2	known	0.85	1388	251	1388	251	y	0.86	1147	183	1147	183	y	0.81	1068	245	1068	245	y	0.82	1074	231	1074	231	y	0.0298575	-5.65685	down	ENSG00000267748.4	CTB-102L5.4	chr19	protein_coding		--
known_NIR_9711	chr19	40050377	40056101	-	40050377	40056189	A5SS	ENST00000617676.4	known	0.23	3	10	3	10	y	0.19	3	13	3	13	y	0.04	1	22	1	22	n	0	0	17	0	17	n	0.0214502	-6.71751	down	ENSG00000128000.15	ZNF780B	chr19	protein_coding	zinc finger protein 780B
known_NIR_10013	chr19	49677316;49679925	49679872;49680487	+	49677316	49680487	cassetteExon	ENST00000391851.8	known	0.21	114.5	443	97;132	443	y	0.19	87	370	60;114	370	y	0.29	129	310	115;143	310	y	0.31	151	334	126;176	334	y	0.0194193	7.07107	up	ENSG00000126457.20	PRMT1	chr19	protein_coding	protein arginine methyltransferase 1
known_NIR_10145	chr19	55166417	55166523	-	55166417	55166512	A5SS	ENST00000455045.5	known	0.71	12	5	12	5	y	0.67	2	1	2	1	n	0.36	5	9	5	9	y	0.27	4	11	4	11	y	0.0429341	-7.6151	down	ENSG00000167646.13	DNAAF3	chr19	protein_coding	dynein, axonemal, assembly factor 3
known_NIR_10604	chr2	161161412	161179614	+	161137063	161179614	A5SS	ENST00000259075.6	known	0.79	26	7	26	7	y	0.75	15	5	15	5	y	0.61	17	11	17	11	y	0.58	30	22	30	22	y	0.0240904	-7	down	ENSG00000136560.13	TANK	chr2	protein_coding	TRAF family member-associated NFKB activator
known_NIR_10692	chr2	189795951	189818017	+	189795951	189805652	3pMXE	ENST00000409985.5	known	0	0	36	0	36	n	0.03	2	66	2	66	y	0.14	8	50	8	50	y	0.16	5	26	5	26	y	0.025109	7.48845	up	ENSG00000064933.16	PMS1	chr2	protein_coding	PMS1 postmeiotic segregation increased 1 (S. cerevisiae)
known_NIR_10693	chr2	189795951;189805754	189805652;189818017	+	189795951	189818017	cassetteExon	ENST00000624204.3	known	1	27	0	36;18	0	n	0.97	57.5	2	66;49	2	y	0.84	43	8	50;36	8	y	0.82	23.5	5	26;21	5	y	0.0198301	-8.59785	down	ENSG00000064933.16	PMS1	chr2	protein_coding	PMS1 postmeiotic segregation increased 1 (S. cerevisiae)
known_NIR_10811	chr2	20701652	20774810	-	20701652;20740205	20739971;20774810	ES	ENST00000619656.4	known	0.02	2	81.5	2	88;75	y	0.03	2	76	2	80;72	y	0.11	8	64.5	8	45;84	y	0.12	9	68	9	73;63	y	0.00611627	12.7279	up	ENSG00000118961.14	LDAH	chr2	protein_coding	lipid droplet associated hydrolase
known_NIR_10913	chr2	219228485	219229535	-	219228485	219229010	5pMXE	ENST00000409618.5	known	0.36	42	74	42	74	y	0.34	28	55	28	55	y	0.24	17	53	17	53	y	0.26	17	49	17	49	y	0.0194193	-7.07107	down	ENSG00000198925.10	ATG9A	chr2	protein_coding	autophagy related 9A
known_NIR_10997	chr2	235671057	235709179	+	235494849	235709179	A5SS	ENST00000409457.5	known	0.1	4	36	4	36	y	0.15	3	17	3	17	y	0.38	14	23	14	23	y	0.42	5	7	5	7	y	0.0152953	8.58956	up	ENSG00000157985.17	AGAP1	chr2	protein_coding	ArfGAP with GTPase domain, ankyrin repeat and PH domain 1
known_NIR_11185	chr2	37196520;37198672	37198494;37199704	+	37196520	37199704	cassetteExon	ENST00000402297.5	known	0.15	11	63	0;22	63	n	0.16	14	76	10;18	76	y	0.06	4.5	66	2;7	66	y	0.04	3	68	0;6	68	n	0.0273751	-9.39149	down	ENSG00000218739.9	CEBPZOS	chr2	protein_coding	CEBPZ opposite strand
known_NIR_11205	chr2	39299801	39309461	-	39299801;39308005	39307943;39309461	ES	ENST00000263881.7	known	0.75	40	13	40	8;18	y	0.76	46	14.5	46	17;12	y	0.72	35	13.5	35	15;12	y	0.71	60	25	60	28;22	y	0.0298575	-5.65685	down	ENSG00000011566.14	MAP4K3	chr2	protein_coding	mitogen-activated protein kinase kinase kinase kinase 3
known_NIR_11294	chr2	61017851	61031419	+	61017851	61018162	3pMXE	ENST00000444100.2	known	1	95	0	95	0	n	0.98	85	2	85	2	y	0.88	81	11	81	11	y	0.85	63	11	63	11	y	0.0286201	-6.93375	down	ENSG00000162928.8	PEX13	chr2	protein_coding	peroxisomal biogenesis factor 13
known_NIR_11415	chr2	73768952	73769265	-	73767207	73769265	A3SS	ENST00000272444.7	known	0.15	16	94	16	94	y	0.13	14	90	14	90	y	0.33	36	73	36	73	y	0.3	36	85	36	85	y	0.016102	9.70725	up	ENSG00000144048.10	DUSP11	chr2	protein_coding	dual specificity phosphatase 11 (RNA/RNP complex 1-interacting)
known_NIR_11442	chr2	74657624	74662732	+	74657624	74674498	A3SS	ENST00000339773.9	known	0.6	3	2	3	2	n	0.45	5	6	5	6	y	0.14	1	6	1	6	n	0	0	5	0	5	n	0.0476742	-4.43507	down	ENSG00000135622.12	SEMA4F	chr2	protein_coding	sema domain, immunoglobulin domain (Ig), transmembrane domain (TM) and short cytoplasmic domain, (semaphorin) 4F
known_NIR_11606	chr20	25195867;25206590	25206522;25207076	+	25195867	25207076	cassetteExon	ENST00000354989.9	known	0.56	24.5	19	26;23	19	y	0.61	12.5	8	18;7	8	y	0.81	25	6	33;17	6	y	0.76	35.5	11	47;24	11	y	0.0298575	5.65685	up	ENSG00000197586.12	ENTPD6	chr20	protein_coding	ectonucleoside triphosphate diphosphohydrolase 6 (putative)
known_NIR_11691	chr20	35632923	35664760	-	35632923;35659014	35658930;35664760	ES	ENST00000397445.5	known	0.85	215	38.5	215	16;61	y	0.84	182	35.5	182	22;49	y	0.77	192	56.5	192	29;84	y	0.78	159	46	159	28;64	y	0.0100505	-9.89949	down	ENSG00000214078.11	CPNE1	chr20	protein_coding	copine I
known_NIR_11763	chr20	37298879	37301208	+	37289686	37301208	A5SS	ENST00000373606.7	known	0.95	165	9	165	9	y	0.93	162	12	162	12	y	0.8	122	30	122	30	y	0.83	120	24	120	24	y	0.0286201	-6.93375	down	ENSG00000101363.12	MANBAL	chr20	protein_coding	mannosidase, beta A, lysosomal-like
known_NIR_11842	chr20	44531978	44589797	+	44582731	44589797	5pMXE	ENST00000372886.5	known	0.44	23	29	23	29	y	0.36	26	46	26	46	y	0.71	25	10	25	10	y	0.78	43	12	43	12	y	0.0239436	6.49097	up	ENSG00000168734.13	PKIG	chr20	protein_coding	protein kinase (cAMP-dependent, catalytic) inhibitor gamma
known_NIR_11843	chr20	44531978;44582731	44582585;44589797	+	44531978	44589797	cassetteExon	ENST00000372894.7	known	0.44	18	23	7;29	23	y	0.47	23	26	0;46	26	n	0.17	5	25	0;10	25	n	0.18	9.5	43	7;12	43	y	0.0202306	-17.7088	down	ENSG00000168734.13	PKIG	chr20	protein_coding	protein kinase (cAMP-dependent, catalytic) inhibitor gamma
known_NIR_11853	chr20	44938191	44939126	+	44938191	44938674	3pMXE	ENST00000217073.6	known	0.41	17	24	17	24	y	0.42	13	18	13	18	y	0.05	3	52	3	52	y	0.02	1	40	1	40	n	0.0139506	-24.0333	down	ENSG00000101104.12	PABPC1L	chr20	protein_coding	poly(A) binding protein, cytoplasmic 1-like
known_NIR_11854	chr20	44938191	44939126	+	44938191;44938748	44938674;44939126	ES	ENST00000255136.7	known	0.53	17	15	17	24;6	y	0.5	13	13	13	18;8	y	0.07	3	43	3	52;34	y	0.03	1	31.5	1	40;23	n	0.00402001	-18.6	down	ENSG00000101104.12	PABPC1L	chr20	protein_coding	poly(A) binding protein, cytoplasmic 1-like
known_NIR_11986	chr20	56388202;56388784	56388687;56392154	-	56388202;56390665	56390556;56392154	MXE	ENST00000395914.5	known	0.33	23.5	47.5	47;0	67;28	n	0.32	23.5	50.5	47;0	83;18	n	0.37	34.5	58	63;6	87;29	y	0.38	30.5	49.5	60;1	81;18	n	0.0194193	7.07107	up	ENSG00000087586.17	AURKA	chr20	protein_coding	aurora kinase A
known_NIR_12028	chr20	5968025	5972576	+	5968025	5972007	A3SS&ES	ENST00000378883.5	known	0	0	173	0	173	n	0.04	6	136	6	136	y	0.16	33	178	33	178	y	0.13	27	186	27	186	y	0.0439076	5	up	ENSG00000125885.13	MCM8	chr20	protein_coding	minichromosome maintenance complex component 8
known_NIR_12212	chr21	39387855	39390698	+	39380556	39390698	A5SS	ENST00000398753.5	known	0.98	55	1	55	1	n	1	19	0	19	0	n	0.89	17	2	17	2	y	0.88	29	4	29	4	y	0.0273751	-9.39149	down	ENSG00000182093.14	WRB	chr21	protein_coding	tryptophan rich basic protein
known_NIR_12273	chr21	46221975	46222663	-	46221975	46222630	A5SS	ENST00000356396.8	known	0.05	16	275	16	275	y	0.06	17	267	17	267	y	0.11	33	261	33	261	y	0.12	40	280	40	280	y	0.0136061	8.48528	up	ENSG00000160285.14	LSS	chr21	protein_coding	lanosterol synthase (2,3-oxidosqualene-lanosterol cyclase)
known_NIR_12443	chr22	23686995	23690232	-	23686995	23690236	A5SS	ENST00000455485.5	known	0.55	12	10	12	10	y	0.53	8	7	8	7	y	0.4	6	9	6	9	y	0.41	11	16	11	16	y	0.0189814	-12.0748	down	ENSG00000228315.11	GUSBP11	chr22	processed_transcript	glucuronidase, beta pseudogene 11
known_NIR_12516	chr22	29549158;29550843	29550728;29553671	-	29549158	29553671	cassetteExon	ENST00000490103.5	known	0.39	34.5	55	49;20	55	y	0.41	41.5	59	64;19	59	y	0.5	40	40	55;25	40	y	0.48	29.5	32	50;9	32	y	0.0238129	6.36396	up	ENSG00000100296.13	THOC5	chr22	protein_coding	THO complex 5
known_NIR_12572	chr22	31327309	31335692	-	31327309;31328924	31328787;31335692	ES	ENST00000266269.9	known	0.79	26	7	26	14;0	n	0.78	28	8	28	11;5	y	0.71	30	12.5	30	16;9	y	0.72	17	6.5	17	9;4	y	0.0100505	-9.89949	down	ENSG00000100105.17	PATZ1	chr22	protein_coding	POZ (BTB) and AT hook containing zinc finger 1
known_NIR_12628	chr22	38126449	38129454	-	38126449;38128430	38128269;38129454	ES	ENST00000332509.7	known	0.27	5	13.5	5	7;20	y	0.31	5	11	5	7;15	y	0.71	12	5	12	3;7	y	0.68	23	11	23	3;19	y	0.00518792	16.2	up	ENSG00000184381.18	PLA2G6	chr22	protein_coding	phospholipase A2, group VI (cytosolic, calcium-independent)
known_NIR_12642	chr22	38380990	38398780	-	38380990	38398438	5pMXE	ENST00000400206.6	known	0.83	15	3	15	3	y	0.82	14	3	14	3	y	0.53	9	8	9	8	y	0.55	6	5	6	5	y	0.00635149	-25.4912	down	ENSG00000213923.10	CSNK1E	chr22	protein_coding	casein kinase 1, epsilon
known_NIR_12659	chr22	40267036	40273425	+	40270280	40273425	A5SS&ES	ENST00000301923.13	known	0.75	30	10	30	10	y	0.7	19	8	19	8	y	0.48	12	13	12	13	y	0.54	14	12	14	12	y	0.0337266	-5.50559	down	ENSG00000100354.20	TNRC6B	chr22	protein_coding	trinucleotide repeat containing 6B
known_NIR_13083	chr3	146533550	146544467	-	146533550;146536565	146536540;146544467	ES	ENST00000342435.8	known	0.22	45	156.5	45	170;143	y	0.21	40	150	40	164;136	y	0.16	37	191.5	37	192;191	y	0.15	28	163.5	28	177;150	y	0.0136061	-8.48528	down	ENSG00000188313.12	PLSCR1	chr3	protein_coding	phospholipid scramblase 1
known_NIR_13208	chr3	172040624	172112452	+	172039771	172112452	A5SS	ENST00000421757.5	known	0.28	45	116	45	116	y	0.29	37	90	37	90	y	0.22	31	109	31	109	y	0.2	38	155	38	155	y	0.0445338	-6.7082	down	ENSG00000075420.12	FNDC3B	chr3	protein_coding	fibronectin type III domain containing 3B
known_NIR_13287	chr3	185658409	185675296	-	185658409;185672669	185672541;185675296	ES	ENST00000382199.6	known	0.46	32	37	32	24;50	y	0.42	29	39.5	29	20;59	y	0.24	15	48.5	15	32;65	y	0.27	23	63.5	23	56;71	y	0.0217889	-7.4	down	ENSG00000073792.15	IGF2BP2	chr3	protein_coding	insulin-like growth factor 2 mRNA binding protein 2
known_NIR_13424	chr3	33068970	33072544	-	33065557	33072544	A3SS	ENST00000307377.12	known	1	175	0	175	0	n	0.99	147	2	147	2	y	0.95	224	11	224	11	y	0.96	184	7	184	7	y	0.0298575	-5.65685	down	ENSG00000170266.15	GLB1	chr3	protein_coding	galactosidase, beta 1
known_NIR_13473	chr3	42160473	42176814	+	42125614	42176814	A5SS	ENST00000487159.5	known	0.32	30	63	30	63	y	0.31	30	67	30	67	y	0.22	17	62	17	62	y	0.21	20	76	20	76	y	0.00496281	-14.1421	down	ENSG00000182606.14	TRAK1	chr3	protein_coding	trafficking protein, kinesin binding 1
known_NIR_13811	chr3	71053773	71064824	-	71053773	71112536	A5SS	ENST00000318789.8	known	0.59	24	17	24	17	y	0.69	18	8	18	8	y	0.29	12	30	12	30	y	0.17	3	15	3	15	y	0.0368256	-5.24951	down	ENSG00000114861.18	FOXP1	chr3	protein_coding	forkhead box P1
known_NIR_14099	chr4	182915575	182917311	-	182915575	182917288	A5SS	ENST00000357067.7	known	0.18	5	23	5	23	y	0.2	5	20	5	20	y	0.36	8	14	8	14	y	0.33	12	24	12	24	y	0.0198301	8.59785	up	ENSG00000129187.14	DCTD	chr4	protein_coding	dCMP deaminase
known_NIR_14170	chr4	38049898	38051899	+	38049898	38054199	A3SS	ENST00000261439.8	known	0.15	7	41	7	41	y	0.14	9	56	9	56	y	0.02	1	59	1	59	n	0	0	60	0	60	n	0.0189814	-12.0748	down	ENSG00000065882.15	TBC1D1	chr4	protein_coding	TBC1 (tre-2/USP6, BUB2, cdc16) domain family, member 1
known_NIR_14307	chr4	82862572	82863318	-	82857764	82863318	A3SS	ENST00000348405.8	known	0.29	65	159	65	159	y	0.31	83	187	83	187	y	0.19	52	224	52	224	y	0.21	54	198	54	198	y	0.0194193	-7.07107	down	ENSG00000138674.16	SEC31A	chr4	protein_coding	SEC31 homolog A (S. cerevisiae)
known_NIR_14463	chr5	1268633	1271119	-	1268633	1278641	A5SS	ENST00000508104.2	known	0.64	7	4	7	4	y	0.75	6	2	6	2	n	0	0	8	0	8	n	0.11	1	8	1	8	n	0.0144511	-8.22815	down	ENSG00000164362.18	TERT	chr5	protein_coding	telomerase reverse transcriptase
known_NIR_14784	chr5	176355749	176359811	-	176359567	176359811	A3SS&ES	ENST00000533553.5	known	0.36	32	57	32	57	y	0.34	14	27	14	27	y	0.23	26	89	26	89	y	0.22	19	68	19	68	y	0.0212375	-11.1803	down	ENSG00000122203.14	KIAA1191	chr5	protein_coding	KIAA1191
known_NIR_14811	chr5	177093501	177093654	+	177093551	177093654	A5SS	ENST00000292408.8	known	0.09	9	87	9	87	y	0.11	7	55	7	55	y	0.03	3	86	3	86	y	0.01	1	126	1	126	n	0.0298575	-5.65685	down	ENSG00000160867.14	FGFR4	chr5	protein_coding	fibroblast growth factor receptor 4
known_NIR_14962	chr5	44786952	44808642	-	44746038	44808642	A3SS	ENST00000503452.5	known	0.31	5	11	5	11	y	0.17	4	19	4	19	y	0.83	10	2	10	2	y	1	6	0	6	0	n	0.0278927	6.13003	up	ENSG00000251141.5	RP11-53O19.1	chr5	antisense		--
known_NIR_14971	chr5	50759732	50761821	+	50759732;50760362	50760292;50761821	ES	ENST00000505697.6	known	0.35	36	67	36	60;74	y	0.39	45	71	45	65;77	y	0.18	17	80	17	68;92	y	0.15	18	105.5	18	92;119	y	0.0180874	-8.2	down	ENSG00000151883.16	PARP8	chr5	protein_coding	poly (ADP-ribose) polymerase family, member 8
known_NIR_14978	chr5	53108643	53109251	-	53108643	53109712	A5SS	ENST00000361377.8	known	0.12	12	87	12	87	y	0.11	10	84	10	84	y	0.24	16	50	16	50	y	0.22	16	56	16	56	y	0.0239816	10.2859	up	ENSG00000164172.18	MOCS2	chr5	protein_coding	molybdenum cofactor synthesis 2
known_NIR_15002	chr5	59157362	59180595	-	59038971	59180595	A3SS	ENST00000340635.10	known	0.17	38	184	38	184	y	0.16	23	121	23	121	y	0.24	36	117	36	117	y	0.25	44	132	44	132	y	0.00772212	11.3137	up	ENSG00000113448.16	PDE4D	chr5	protein_coding	phosphodiesterase 4D, cAMP-specific
known_NIR_15011	chr5	65551242	65551564	-	65542848	65551564	A3SS	ENST00000514814.5	known	0.08	21	229	21	229	y	0.07	17	223	17	223	y	0.12	36	262	36	262	y	0.11	23	193	23	193	y	0.0298575	5.65685	up	ENSG00000123219.12	CENPK	chr5	protein_coding	centromere protein K
known_NIR_15030	chr5	66153596	66159219	+	66153596	66156065	3pMXE	ENST00000612404.4	known	0.9	171	19	171	19	y	0.89	114	14	114	14	y	0.74	95	33	95	33	y	0.73	122	44	122	44	y	0.00194742	-22.6274	down	ENSG00000153914.15	SREK1	chr5	protein_coding	splicing regulatory glutamine/lysine-rich protein 1
known_NIR_15066	chr5	70067446	70070641	+	70067446;70069330	70069235;70070641	ES	ENST00000380743.8	known	0.03	17	495	17	554;436	y	0.02	8	497	8	560;434	y	0.07	39	541	39	632;450	y	0.08	42	515	42	611;419	y	0.0194193	7.07107	up	ENSG00000205571.12	SMN2	chr5	protein_coding	survival of motor neuron 2, centromeric
known_NIR_15117	chr5	78816114	78839356	-	78781974	78839356	A3SS	ENST00000264914.8	known	0.06	2	30	2	30	y	0.07	2	25	2	25	y	0.35	11	20	11	20	y	0.34	13	25	13	25	y	0.000637146	39.598	up	ENSG00000113273.15	ARSB	chr5	protein_coding	arylsulfatase B
known_NIR_15118	chr5	79612769	79613011	+	79612735	79613011	A5SS	ENST00000423041.6	known	0.55	11	9	11	9	y	0.64	7	4	7	4	y	0.19	3	13	3	13	y	0.24	4	13	4	13	y	0.0335993	-7.38177	down	ENSG00000164329.13	PAPD4	chr5	protein_coding	PAP associated domain containing 4
known_NIR_15124	chr5	80649494	80654404	-	80649494;80654057	80654008;80654404	ES	ENST00000439211.6	known	0.05	25	490.5	25	470;511	y	0.04	19	511.5	19	494;529	y	0	0	478.5	0	460;497	n	0.01	3	508.5	3	455;562	y	0.0298575	-5.65685	down	ENSG00000228716.6	DHFR	chr5	protein_coding	dihydrofolate reductase
known_NIR_15373	chr6	143333445	143334078	+	143333445	143339639	A3SS	ENST00000357847.8	known	0.13	8	53	8	53	y	0.08	3	33	3	33	y	0.25	9	27	9	27	y	0.28	12	31	12	31	y	0.0481499	5.48795	up	ENSG00000146416.16	AIG1	chr6	protein_coding	androgen-induced 1
known_NIR_15480	chr6	170554463	170556879	+	170554463	170556882	A3SS	ENST00000392092.6	known	0.1	5	45	5	45	y	0.15	8	46	8	46	y	0.41	20	29	20	29	y	0.35	17	32	17	32	y	0.0245447	6.52988	up	ENSG00000112592.12	TBP	chr6	protein_coding	TATA box binding protein
known_NIR_15483	chr6	170578656	170578857	-	170577717	170578857	A3SS	ENST00000541970.5	known	0.19	53	229	53	229	y	0.21	60	223	60	223	y	0.12	33	241	33	241	y	0.14	28	173	28	173	y	0.0384761	-4.94975	down	ENSG00000071994.10	PDCD2	chr6	protein_coding	programmed cell death 2
known_NIR_15658	chr6	31403702	31410543	+	31400783	31410543	A5SS	ENST00000616296.4	known	0.94	182	11	182	11	y	0.93	167	13	167	13	y	0.83	139	28	139	28	y	0.82	142	32	142	32	y	0.00410679	-15.5563	down	ENSG00000204520.12	MICA	chr6	protein_coding	MHC class I polypeptide-related sequence A
known_NIR_15805	chr6	36894603	36899426	+	36883352	36899426	A5SS	ENST00000359359.6	known	0.98	84	2	84	2	y	1	73	0	73	0	n	0.91	42	4	42	4	y	0.93	57	4	57	4	y	0.0384761	-4.94975	down	ENSG00000198663.16	C6orf89	chr6	protein_coding	chromosome 6 open reading frame 89
known_NIR_15848	chr6	42965789	42966504	-	42965789	42966044	A5SS&ES	ENST00000304611.12	known	0.11	6	48	6	48	y	0.13	8	55	8	55	y	0.02	1	52	1	52	n	0	0	98	0	98	n	0.0161301	-7.77817	down	ENSG00000124587.13	PEX6	chr6	protein_coding	peroxisomal biogenesis factor 6
known_NIR_15989	chr6	7579772	7582642	+	7581569	7582642	A5SS	ENST00000379802.7	known	0.46	276	325	276	325	y	0.47	332	375	332	375	y	0.42	267	375	267	375	y	0.43	299	397	299	397	y	0.0298575	-5.65685	down	ENSG00000096696.13	DSP	chr6	protein_coding	desmoplakin
known_NIR_16008	chr6	85536924;85538864	85538838;85541985	-	85536924	85541985	cassetteExon	ENST00000346348.7	known	0.09	19	194	19;19	194	y	0.08	17	205	17;17	205	y	0.03	6	204	6;6	204	y	0.04	11	273	14;8	273	y	0.0194193	-7.07107	down	ENSG00000135317.12	SNX14	chr6	protein_coding	sorting nexin 14
known_NIR_16117	chr7	102376322	102395977	+	102376322	102399548	A3SS	ENST00000462601.5	known	0.98	95	2	95	2	y	1	105	0	105	0	n	0.91	101	10	101	10	y	0.93	133	10	133	10	y	0.0384761	-4.94975	down	ENSG00000128563.13	PRKRIP1	chr7	protein_coding	PRKR interacting protein 1 (IL11 inducible)
known_NIR_16134	chr7	102640773	102666077	-	102640773	102642630	5pMXE	ENST00000519541.1	known	0.56	145	113	145	113	y	0.55	158	127	158	127	y	0.48	125	133	125	133	y	0.47	101	115	101	115	y	0.00772212	-11.3137	down	ENSG00000205236.6	RP11-514P8.6	chr7	protein_coding		--
known_NIR_16197	chr7	117209922	117219084	+	117209937	117219084	A5SS	ENST00000265437.9	known	0.09	7	69	7	69	y	0.07	4	56	4	56	y	0	0	41	0	41	n	0.02	1	61	1	61	n	0.0384761	-4.94975	down	ENSG00000004866.18	ST7	chr7	protein_coding	suppression of tumorigenicity 7
known_NIR_16272	chr7	135398226	135410515	-	135398226	135410524	A5SS	ENST00000451834.5	known	0.38	15	25	15	25	y	0.39	19	30	19	30	y	0.33	15	30	15	30	y	0.34	28	54	28	54	y	0.0194193	-7.07107	down	ENSG00000080802.18	CNOT4	chr7	protein_coding	CCR4-NOT transcription complex, subunit 4
known_NIR_16277	chr7	139078653	139079104	-	139078653	139079470	A5SS	ENST00000242351.9	known	0.14	12	74	12	74	y	0.12	10	76	10	76	y	0.03	2	63	2	63	y	0.04	4	105	4	105	y	0.0316556	-8.49706	down	ENSG00000105939.12	ZC3HAV1	chr7	protein_coding	zinc finger CCCH-type, antiviral 1
known_NIR_16331	chr7	143716000	143719683	+	143703617	143719683	A5SS	ENST00000444908.6	known	0.06	3	50	3	50	y	0.09	4	42	4	42	y	0.21	5	19	5	19	y	0.22	13	46	13	46	y	0.0468821	8.85438	up	ENSG00000170379.19	TCAF2	chr7	protein_coding	TRPM8 channel-associated factor 2
known_NIR_16344	chr7	144307232	144311591	-	144300536	144311591	A3SS	ENST00000496968.5	known	0.8	4	1	4	1	n	0.87	13	2	13	2	y	0.29	2	5	2	5	n	0.4	2	3	2	3	n	0.0267339	-7.51626	down	ENSG00000244479.6	OR2A1-AS1	chr7	antisense	OR2A1 antisense RNA 1
known_NIR_16552	chr7	33349170;33352873	33352859;33357855	+	33349170	33357855	cassetteExon	ENST00000350941.7	known	0.58	5.5	4	0;11	4	n	0.52	11	10	1;21	10	n	0.82	18	4	0;36	4	n	0.76	18.5	6	4;33	6	y	0.0298575	5.65685	up	ENSG00000122507.20	BBS9	chr7	protein_coding	Bardet-Biedl syndrome 9
known_NIR_16572	chr7	40088331	40092965	+	40088331	40092785	A3SS	ENST00000181839.8	known	0.8	96	24	96	24	y	0.86	113	19	113	19	y	0.58	83	59	83	59	y	0.65	88	47	88	47	y	0.0449627	-4.664	down	ENSG00000065883.14	CDK13	chr7	protein_coding	cyclin-dependent kinase 13
known_NIR_16615	chr7	44748991	44756188	+	44748631	44756188	A5SS	ENST00000413916.5	known	0.64	46	26	46	26	y	0.65	70	38	70	38	y	0.49	32	33	32	33	y	0.52	26	24	26	24	y	0.0468821	-8.85438	down	ENSG00000122515.14	ZMIZ2	chr7	protein_coding	zinc finger, MIZ-type containing 2
known_NIR_16652	chr7	50448289	50450301	-	50448289;50449723	50449118;50450301	ES	ENST00000433017.5	known	0.14	4	24.5	4	14;35	y	0.17	5	24.5	5	17;32	y	0.25	11	32.5	11	15;50	y	0.28	13	34	13	29;39	y	0.0352362	5.18545	up	ENSG00000132436.11	FIGNL1	chr7	protein_coding	fidgetin-like 1
known_NIR_16700	chr7	55981567	55983728	+	55981567;55982280	55982210;55983728	ES	ENST00000322090.7	known	0.08	20	231	20	221;241	y	0.09	26	255.5	26	233;278	y	0.04	9	237.5	9	228;247	y	0.03	6	216	6	219;213	y	0.0194193	-7.07107	down	ENSG00000146729.9	GBAS	chr7	protein_coding	glioblastoma amplified sequence
known_NIR_16794	chr7	73736691;73737110	73736929;73737562	-	73736691	73737562	cassetteExon	ENST00000458339.5	known	0.73	50.5	19	92;9	19	y	0.71	30	12	55;5	12	y	0.93	26	2	46;6	2	y	0.92	33	3	59;7	3	y	0.0102997	18.3358	up	ENSG00000106077.18	ABHD11	chr7	protein_coding	abhydrolase domain containing 11
known_NIR_16795	chr7	73736691;73737391	73736929;73737562	-	73736691	73737562	cassetteExon	ENST00000458339.5	known	0.77	64.5	19	92;37	19	y	0.79	45	12	55;35	12	y	0.96	47	2	46;48	2	y	0.94	50	3	59;41	3	y	0.0068494	12.0208	up	ENSG00000106077.18	ABHD11	chr7	protein_coding	abhydrolase domain containing 11
known_NIR_16837	chr7	76030527	76047812	-	76030524	76047812	A3SS	ENST00000340062.9	known	0.36	46	81	46	81	y	0.37	34	59	34	59	y	0.33	45	90	45	90	y	0.32	46	96	46	96	y	0.0298575	-5.65685	down	ENSG00000127952.16	STYXL1	chr7	protein_coding	serine/threonine/tyrosine interacting-like 1
known_NIR_16946	chr7	99505160	99506005	+	99504733	99506005	A5SS	ENST00000326775.9	known	0.23	3	10	3	10	y	0.27	4	11	4	11	y	0.4	4	6	4	6	y	0.43	13	17	13	17	y	0.026784	6.6	up	ENSG00000196652.11	ZKSCAN5	chr7	protein_coding	zinc finger with KRAB and SCAN domains 5
known_NIR_16961	chr7	99676576	99679826	-	99676208	99679826	A3SS	ENST00000222982.8	known	0.59	29	20	29	20	y	0.48	11	12	11	12	y	0.24	8	25	8	25	y	0.14	5	31	5	31	y	0.0441666	-4.64144	down	ENSG00000106258.13	CYP3A5	chr7	protein_coding	cytochrome P450, family 3, subfamily A, polypeptide 5
known_NIR_16975	chr8	100948900	100950406	-	100948900	100951456	A5SS	ENST00000395953.6	known	0.58	32	23	32	23	y	0.59	72	50	72	50	y	0.62	63	39	63	39	y	0.63	47	28	47	28	y	0.0298575	5.65685	up	ENSG00000164924.17	YWHAZ	chr8	protein_coding	tyrosine 3-monooxygenase/tryptophan 5-monooxygenase activation protein, zeta
known_NIR_17168	chr8	143018586;143020377	143020262;143020883	+	143018586;143019119	143018833;143020883	MXE	ENST00000520466.5	known	0.3	5	11.5	6;4	4;19	y	0.38	5.5	9	3;8	2;16	y	0.72	9	3.5	12;6	0;7	n	0.64	16	9	16;16	3;15	y	0.0265828	6.01041	up	ENSG00000160932.10	LY6E	chr8	protein_coding	lymphocyte antigen 6 complex, locus E
known_NIR_17327	chr8	22138793;22139061	22138926;22139416	-	22138793	22139416	cassetteExon	ENST00000334530.9	known	0.9	166	19	100;232	19	y	0.91	147.5	15	127;168	15	y	0.97	147.5	5	117;178	5	y	0.96	151	7	102;200	7	y	0.0136061	8.48528	up	ENSG00000168476.11	REEP4	chr8	protein_coding	receptor accessory protein 4
known_NIR_17345	chr8	230907	232129	-	219417	232129	A3SS	ENST00000606975.1	known	1	15	0	15	0	n	0.85	11	2	11	2	y	0.29	2	5	2	5	n	0.43	9	12	9	12	y	0.0317544	-5.50728	down	ENSG00000223508.5	RPL23AP53	chr8	transcribed_processed_pseudogene	ribosomal protein L23a pseudogene 53
known_NIR_17411	chr8	38428435	38457356	-	38428435;38429948	38429682;38457356	ES	ENST00000425967.7	known	0.64	111	63	111	67;59	y	0.63	110	65	110	62;68	y	0.72	152	59.5	152	71;48	y	0.7	154	66.5	154	90;43	y	0.0445338	6.7082	up	ENSG00000077782.19	FGFR1	chr8	protein_coding	fibroblast growth factor receptor 1
known_NIR_17412	chr8	38428435	38457356	-	38429948	38457356	A3SS&ES	ENST00000341462.8	known	0.65	111	59	111	59	y	0.62	110	68	110	68	y	0.76	152	48	152	48	y	0.78	154	43	154	43	y	0.025109	7.48845	up	ENSG00000077782.19	FGFR1	chr8	protein_coding	fibroblast growth factor receptor 1
known_NIR_17426	chr8	41506012	41507054	+	41506012	41507059	A3SS	ENST00000518270.5	known	0.17	35	166	35	166	y	0.14	17	104	17	104	y	0.31	51	115	51	115	y	0.28	44	113	44	113	y	0.0221976	6.59966	up	ENSG00000147533.16	GOLGA7	chr8	protein_coding	golgin A7
known_NIR_17456	chr8	47279980	47284028	+	47280017	47284028	A5SS	ENST00000297423.8	known	0	0	95	0	95	n	0.01	1	120	1	120	n	0.04	4	86	4	86	y	0.05	8	146	8	146	y	0.0298575	5.65685	up	ENSG00000164808.16	SPIDR	chr8	protein_coding	scaffolding protein involved in DNA repair
known_NIR_17596	chr8	81715114	81718182	-	81715114;81717288	81717249;81718182	ES	ENST00000523096.5	known	0.46	167	199	167	242;156	y	0.45	157	193.5	157	231;156	y	0.53	247	222	247	263;181	y	0.55	195	157.5	195	171;144	y	0.037184	7.60263	up	ENSG00000104231.10	ZFAND1	chr8	protein_coding	zinc finger, AN1-type domain 1
known_NIR_17649	chr8	96231621	96231774	-	96231515	96231774	A3SS	ENST00000523920.1	known	0.38	59	98	59	98	y	0.37	31	53	31	53	y	0.43	50	66	50	66	y	0.44	55	69	55	69	y	0.0136061	8.48528	up	ENSG00000156467.9	UQCRB	chr8	protein_coding	ubiquinol-cytochrome c reductase binding protein
known_NIR_17691	chr9	109420600	109426950	-	109420600;109422852	109422718;109426950	ES	ENST00000412145.5	known	0.47	46	51	46	48;54	y	0.42	35	48	35	41;55	y	0.68	48	23	48	20;26	y	0.72	72	28.5	72	28;29	y	0.0176142	7.96486	up	ENSG00000070159.13	PTPN3	chr9	protein_coding	protein tyrosine phosphatase, non-receptor type 3
known_NIR_17710	chr9	112297916	112330441	-	112297916	112332784	A5SS	ENST00000458258.5	known	0.8	12	3	12	3	y	0.74	14	5	14	5	y	0.43	3	4	3	4	n	0.42	5	7	5	7	y	0.049479	-11.3435	down	ENSG00000119314.15	PTBP3	chr9	protein_coding	polypyrimidine tract binding protein 3
known_NIR_17818	chr9	125484583	125543059	-	125484583;125506417	125506310;125543059	ES	ENST00000373498.5	known	0.43	111	148.5	111	167;130	y	0.42	117	159.5	117	167;152	y	0.5	155	156	155	155;157	y	0.49	155	159.5	155	164;155	y	0.0100505	9.89949	up	ENSG00000119487.16	MAPKAP1	chr9	protein_coding	mitogen-activated protein kinase associated protein 1
known_NIR_17843	chr9	127733560	127735120	-	127733560;127734564	127734299;127735120	ES	ENST00000336067.10	known	0.31	18	41	18	52;30	y	0.36	23	41.5	23	53;30	y	0.1	3	26	3	28;24	y	0.04	2	45.5	2	71;20	y	0.0228357	-6.78595	down	ENSG00000160404.17	TOR2A	chr9	protein_coding	torsin family 2, member A
known_NIR_17855	chr9	127896332	127899503	-	127896332	127905207	A5SS	ENST00000622357.4	known	0.47	9	10	9	10	y	0.48	10	11	10	11	y	0.82	36	8	36	8	y	0.8	16	4	16	4	y	0.00500936	29.9633	up	ENSG00000160408.14	ST6GALNAC6	chr9	protein_coding	ST6 (alpha-N-acetyl-neuraminyl-2,3-beta-galactosyl-1,3)-N-acetylgalactosaminide alpha-2,6-sialyltransferase 6
known_NIR_18148	chr9	34297114	34306252	-	34271930	34306252	A3SS	ENST00000379174.7	known	0.45	5	6	5	6	y	0.56	5	4	5	4	n	0.95	18	1	18	1	n	1	10	0	10	0	n	0.0406114	7.7795	up	ENSG00000186638.15	KIF24	chr9	protein_coding	kinesin family member 24
known_NIR_18193	chr9	36376127	36400554	-	36376127;36390616	36390467;36400554	ES	ENST00000357058.7	known	0.56	7	5.5	7	11;0	n	0.54	7	6	7	8;4	y	0.3	4	9.5	4	17;2	y	0.24	3	9.5	3	14;5	y	0.0468821	-8.85438	down	ENSG00000137075.17	RNF38	chr9	protein_coding	ring finger protein 38
known_NIR_18238	chr9	5753238	5754841	+	5753238;5753646	5753536;5754841	ES	ENST00000251879.10	known	0.22	13	47	13	44;50	y	0.21	16	62	16	75;49	y	0.1	5	44.5	5	55;34	y	0.12	11	78.5	11	89;68	y	0.0273751	-9.39149	down	ENSG00000107036.11	RIC1	chr9	protein_coding	RAB6A GEF complex partner 1
known_NIR_18248	chr9	65703014	65720041	+	65703014;65708958	65708902;65720041	ES	ENST00000382405.7	known	0.11	14	119	14	75;163	y	0.12	18	129	18	74;184	y	0.15	22	123.5	22	77;170	y	0.16	16	86.5	16	50;123	y	0.0298575	5.65685	up	ENSG00000147996.16	CBWD5	chr9	protein_coding	COBW domain containing 5
known_NIR_18260	chr9	69248224;69251364	69251035;69252815	+	69248224	69252815	cassetteExon	ENST00000453658.6	known	0.87	124	18	7;241	18	y	0.86	101.5	17	3;200	17	y	0.83	107.5	22	6;209	22	y	0.82	104	23	7;201	23	y	0.0298575	-5.65685	down	ENSG00000119139.16	TJP2	chr9	protein_coding	tight junction protein 2
known_NIR_18315	chr9	89405699	89455888	-	89405699;89418118	89418056;89455888	ES	ENST00000455551.6	known	0.22	5	18	5	23;13	y	0.16	5	26.5	5	32;21	y	0.69	17	7.5	17	9;6	y	0.57	12	9	12	9;9	y	0.0459951	6.55913	up	ENSG00000187764.11	SEMA4D	chr9	protein_coding	sema domain, immunoglobulin domain (Ig), transmembrane domain (TM) and short cytoplasmic domain, (semaphorin) 4D
known_NIR_18346	chr9	94928531	94955177	+	94801002	94955177	A5SS	ENST00000297979.9	known	0.69	18	8	18	8	y	0.62	23	14	23	14	y	0.28	12	31	12	31	y	0.16	5	26	5	26	y	0.0405439	-6.2624	down	ENSG00000148120.14	C9orf3	chr9	protein_coding	chromosome 9 open reading frame 3
known_NIR_18370	chrX	101042312	101051644	-	101042312	101051251	A5SS	ENST00000372936.3	known	0.2	4	16	4	16	y	0.25	7	21	7	21	y	0.04	1	25	1	25	n	0	0	26	0	26	n	0.0264129	-6.40312	down	ENSG00000188917.14	TRMT2B	chrX	protein_coding	tRNA methyltransferase 2 homolog B (S. cerevisiae)
known_NIR_18514	chrX	132708494	132956808	-	132629093	132956808	A3SS	ENST00000370836.6	known	0.02	3	118	3	118	y	0.03	4	129	4	129	y	0.08	9	100	9	100	y	0.07	8	110	8	110	y	0.0194193	7.07107	up	ENSG00000171004.17	HS6ST2	chrX	protein_coding	heparan sulfate 6-O-sulfotransferase 2
known_NIR_18517	chrX	134785950	134787472	-	134785947	134787472	A3SS	ENST00000370790.5	known	0.5	198	198	198	198	y	0.53	210	188	210	188	y	0.62	239	147	239	147	y	0.66	286	146	286	146	y	0.0439076	5	up	ENSG00000156504.16	FAM122B	chrX	protein_coding	family with sequence similarity 122B
known_NIR_18697	chrX	24172800	24179183	+	24172800;24173723	24173607;24179183	ES	ENST00000379188.7	known	0.8	38	9.5	38	9;10	y	0.77	36	11	36	12;10	y	0.9	53	6	53	7;5	y	0.92	54	5	54	3;7	y	0.0286201	6.93375	up	ENSG00000005889.15	ZFX	chrX	protein_coding	zinc finger protein, X-linked
known_NIR_18811	chrX	49281461	49281981	+	49281461	49281984	A3SS	ENST00000466508.5	known	0.44	4	5	4	5	n	0.5	10	10	10	10	y	0.79	11	3	11	3	y	0.71	30	12	30	12	y	0.0359328	5.6	up	ENSG00000049769.12	PPP1R3F	chrX	protein_coding	protein phosphatase 1, regulatory subunit 3F
novel_NIR_283	chr1	113100488;113103785	113103609;113107594	+	113100488	113107594	cassetteExon	ENST00000361127.5	novel	0.49	12.5	13	2;23	13	y	0.48	23	25	35;11	25	y	0.66	15.5	8	18;13	8	y	0.63	22.5	13	29;16	13	y	0.0398973	10.1193	up	ENSG00000198799.11	LRIG2	chr1	protein_coding	leucine-rich repeats and immunoglobulin-like domains 2
novel_NIR_446	chr1	12335827	12341783	+	12335827	12341780	A3SS	ENST00000613099.4	novel	0.42	10	14	10	14	y	0.31	9	20	9	20	y	0	0	26	0	26	n	0.08	2	22	2	22	n	0.0489201	-4.7789	down	ENSG00000048707.13	VPS13D	chr1	protein_coding	vacuolar protein sorting 13 homolog D (S. cerevisiae)
novel_NIR_495	chr1	1390865	1391297	-	1390865	1393396	A5SS	ENST00000400809.7	novel	0.73	8	3	8	3	y	0.69	24	11	24	11	y	0.49	18	19	18	19	y	0.52	14	13	14	13	y	0.0180874	-8.2	down	ENSG00000221978.11	CCNL2	chr1	protein_coding	cyclin L2
novel_NIR_558	chr1	145395216	145399049	-	145393935	145399049	A3SS	ENST00000620821.1	novel	0	0	12	0	12	n	0.18	2	9	2	9	y	1	3	0	3	0	y	0.93	13	1	13	1	y	0.039546	9.06116	up	ENSG00000162825.16	NBPF20	chr1	protein_coding	neuroblastoma breakpoint family, member 20
novel_NIR_724	chr1	150267789	150268698	-	150267991	150268698	A3SS&ES	ENST00000414276.6	novel	0.04	1	22	1	22	n	0	0	35	0	35	n	0.21	8	31	8	31	y	0.19	5	21	5	21	n	0.0342344	8.04984	up	ENSG00000117362.12	APH1A	chr1	protein_coding	APH1A gamma secretase subunit
novel_NIR_957	chr1	154268954	154270683	+	154268954	154270881	A3SS	ENST00000271877.11	novel	0.35	7	13	7	13	y	0.33	5	10	5	10	y	0.03	1	30	1	30	n	0	0	28	0	28	n	0.00552178	-18.0278	down	ENSG00000143569.18	UBAP2L	chr1	protein_coding	ubiquitin associated protein 2-like
novel_NIR_1112	chr1	155748531	155748648	+	155748531	155748606	A3SS	ENST00000314835.5	novel	0	0	35	0	35	n	0.04	1	26	1	26	n	0.2	3	12	3	12	y	0.15	6	34	6	34	y	0.0439884	4.84139	up	ENSG00000203761.5	MSTO2P	chr1	unprocessed_pseudogene	misato family member 2, pseudogene
novel_NIR_1159	chr1	156213176	156233628	+	156213176;156225668	156225557;156233628	ES	ENST00000368273.8	novel	0.28	4	10.5	4	17;4	y	0.22	2	7	2	10;4	y	0.05	1	17.5	1	23;12	n	0	0	10	0	12;8	n	0.0310012	-5.76166	down	ENSG00000160783.19	PMF1	chr1	protein_coding	polyamine-modulated factor 1
novel_NIR_1308	chr1	16063636	16072292	-	16063636	16073421	A5SS	ENST00000375662.4	novel	0.04	1	26	1	26	n	0	0	21	0	21	n	0.14	3	18	3	18	n	0.17	6	30	6	30	y	0.0383286	5.4	up	ENSG00000185519.8	FAM131C	chr1	protein_coding	family with sequence similarity 131, member C
novel_NIR_1431	chr1	165768269	165768482	-	165768269	165768759	A5SS	ENST00000464650.5	novel	0.23	26	87	26	87	y	0.2	12	48	12	48	y	0.12	8	56	8	56	n	0.09	6	62	6	62	n	0.0352362	-5.18545	down	ENSG00000143183.16	TMCO1	chr1	protein_coding	transmembrane and coiled-coil domains 1
novel_NIR_1526	chr1	171709800	171710714	-	171709744	171710714	A3SS	ENST00000236192.11	novel	0.35	20	37	20	37	y	0.34	20	38	20	38	y	0.03	2	60	2	60	n	0.08	3	35	3	35	n	0.0467622	-11.3747	down	ENSG00000117533.14	VAMP4	chr1	protein_coding	vesicle-associated membrane protein 4
novel_NIR_2158	chr1	222713416;222715269	222715145;222715684	+	222713416	222715684	cassetteExon	ENST00000539697.5	novel	0.1	4.5	42	0;9	42	n	0.17	9.5	45	0;19	45	n	0.34	10	19	0;20	19	n	0.39	11.5	18	4;19	18	y	0.0410296	5.34739	up	ENSG00000162819.11	BROX	chr1	protein_coding	BRO1 domain and CAAX motif containing
novel_NIR_2169	chr1	222815171	222835119	+	222827601	222835119	A5SS&ES	ENST00000435378.5	novel	0.16	6	31	6	31	y	0.21	7	26	7	26	y	0.05	2	39	2	39	n	0	0	12	0	12	n	0.04552	-4.52548	down	ENSG00000228106.5	RP11-452F19.3	chr1	lincRNA		--
novel_NIR_2186	chr1	223993047	224003520	+	223993047;224002622	224002522;224003520	ES	ENST00000622033.4	novel	0.22	5	18	5	8;28	y	0.27	9	24	9	11;37	y	0.42	15	21	15	12;30	y	0.38	7	11.5	7	8;15	y	0.0439884	4.84139	up	ENSG00000185495.10	RP11-504P24.3	chr1	transcribed_unprocessed_pseudogene		--
novel_NIR_2206	chr1	225038823	225085710	+	225038823	225042835	A3SS&ES	ENST00000445597.6	novel	0.25	2	6	2	6	y	0.29	2	5	2	5	y	0	0	1	0	1	n	0.06	1	15	1	15	n	0.0306714	-6.6564	down	ENSG00000185842.14	DNAH14	chr1	protein_coding	dynein, axonemal, heavy chain 14
novel_NIR_2386	chr1	230933861;230936264	230936158;230939386	-	230933861	230939386	cassetteExon	ENST00000366661.8	novel	0.18	7	31	9;5	31	y	0.19	6	25	9;3	25	y	0.13	4	26	8;0	26	n	0.14	4	25	8;0	25	n	0.0194193	-7.07107	down	ENSG00000143643.12	TTC13	chr1	protein_coding	tetratricopeptide repeat domain 13
novel_NIR_2410	chr1	233017154	233054268	-	233017154;233025399	233025146;233054268	ES	ENST00000258229.13	novel	0.07	3	42	3	42;42	n	0	0	38.5	0	34;43	n	0.22	11	38.5	11	39;38	y	0.27	6	16	6	21;11	y	0.0479901	4.8824	up	ENSG00000135749.18	PCNXL2	chr1	protein_coding	pecanex-like 2 (Drosophila)
novel_NIR_2436	chr1	234406099;234409573	234409477;234410445	-	234406099	234410445	cassetteExon	ENST00000040877.1	novel	0.21	34	130	3;65	130	y	0.23	31.5	105	12;51	105	y	0.13	21.5	138	2;41	138	n	0.15	23.5	129	0;47	129	n	0.0298575	-5.65685	down	ENSG00000059588.9	TARBP1	chr1	protein_coding	TAR (HIV-1) RNA binding protein 1
novel_NIR_2460	chr1	235330602	235341708	+	235328778	235341708	A5SS	ENST00000391855.2	novel	0.4	6	9	6	9	y	0.31	5	11	5	11	y	0	0	21	0	21	n	0.07	2	26	2	26	n	0.0345124	-5.61317	down	ENSG00000152904.11	GGPS1	chr1	protein_coding	geranylgeranyl diphosphate synthase 1
novel_NIR_2953	chr1	3454844	3463066	+	3454811	3463066	A5SS	ENST00000378378.8	novel	0.38	21	35	21	35	y	0.4	16	24	16	24	y	0.33	16	32	16	32	y	0.31	15	34	15	34	y	0.0384761	-4.94975	down	ENSG00000130762.14	ARHGEF16	chr1	protein_coding	Rho guanine nucleotide exchange factor (GEF) 16
novel_NIR_3010	chr1	35737075	35737992	-	35737075;35737421	35737339;35737992	ES	ENST00000251195.9	novel	0.04	5	113.5	5	121;106	n	0.07	8	101	8	100;102	n	0.16	21	114	21	117;111	y	0.2	30	117	30	108;126	y	0.0439076	5	up	ENSG00000092853.13	CLSPN	chr1	protein_coding	claspin
novel_NIR_3074	chr1	37798398	37799567	+	37795846	37799567	A5SS	ENST00000329006.5	novel	0.07	1	14	1	14	n	0	0	3	0	3	n	0.5	2	2	2	2	y	0.48	10	11	10	11	y	0.0350809	12.4998	up	ENSG00000185090.14	MANEAL	chr1	protein_coding	mannosidase, endo-alpha-like
novel_NIR_3248	chr1	43431901;43432121	43432062;43432272	+	43431901	43432272	cassetteExon	ENST00000562955.1	novel	0.07	2.5	35	5;0	35	n	0.04	2	51	4;0	51	n	0.18	7	32	10;4	32	y	0.21	11	42	16;6	42	y	0.0221976	6.59966	up	ENSG00000198198.13	SZT2	chr1	protein_coding	seizure threshold 2 homolog (mouse)
novel_NIR_3611	chr1	56706469	56707475	+	56706218	56707475	A5SS	ENST00000371244.8	novel	0.25	38	113	38	113	y	0.27	43	114	43	114	y	0.14	18	114	18	114	n	0.17	30	148	30	148	y	0.0384207	-5.82435	down	ENSG00000162409.10	PRKAA2	chr1	protein_coding	protein kinase, AMP-activated, alpha 2 catalytic subunit
novel_NIR_3811	chr1	6825210	6853052	+	6825210	6887654	A3SS	ENST00000557126.5	novel	0.08	1	11	1	11	n	0	0	6	0	6	n	0.5	3	3	3	3	y	0.54	13	11	13	11	y	0.0225398	10.7331	up	ENSG00000171735.18	CAMTA1	chr1	protein_coding	calmodulin binding transcription activator 1
novel_NIR_4058	chr1	93246954	93256335	+	93246954;93254614	93254471;93256335	ES	ENST00000343253.11	novel	0.09	8	77	8	43;111	n	0.07	5	69	5	53;85	n	0.18	19	88	19	74;102	y	0.19	22	94	22	79;109	y	0.0273751	9.39149	up	ENSG00000122483.17	CCDC18	chr1	protein_coding	coiled-coil domain containing 18
novel_NIR_4461	chr10	116889279	116901765	-	116900540	116901765	3pMXE	ENST00000392903.3	novel	0.67	6	3	6	3	y	0.75	9	3	9	3	y	0.1	1	9	1	9	n	0.14	1	6	1	6	n	0.0166779	-13.1928	down	ENSG00000187164.17	SHTN1	chr10	protein_coding		--
novel_NIR_4908	chr10	28526008	28532442	-	28526008	28531735	5pMXE	ENST00000528337.1	novel	0.84	38	7	38	7	y	0.75	24	8	24	8	y	0.45	18	22	18	22	y	0.39	20	31	20	31	y	0.0286201	-6.93375	down	ENSG00000254635.5	WAC-AS1	chr10	antisense	WAC antisense RNA 1 (head to head)
novel_NIR_5319	chr10	49973142	49987165	+	49982412	49987165	5pMXE	ENST00000618025.4	novel	0.71	17	7	17	7	y	0.75	21	7	21	7	y	0.52	14	13	14	13	y	0.55	12	10	12	10	y	0.0198068	-7.8	down	ENSG00000204149.9	AGAP6	chr10	protein_coding	ArfGAP with GTPase domain, ankyrin repeat and PH domain 6
novel_NIR_5411	chr10	5960567	5977777	-	5960567	5977405	5pMXE	ENST00000397250.6	novel	0.57	4	3	4	3	y	0.5	6	6	6	6	y	0.1	1	9	1	9	n	0	0	8	0	8	n	0.0210922	-7.94655	down	ENSG00000134470.19	IL15RA	chr10	protein_coding	interleukin 15 receptor, alpha
novel_NIR_5541	chr10	70162759	70166276	-	70162759	70170413	A5SS	ENST00000373242.6	novel	0.06	2	29	2	29	n	0	0	16	0	16	n	0.24	5	16	5	16	y	0.19	6	26	6	26	y	0.0444442	4.73736	up	ENSG00000079332.14	SAR1A	chr10	protein_coding	secretion associated, Ras related GTPase 1A
novel_NIR_5668	chr10	73806503	73806657	-	73806474	73806657	A3SS	ENST00000603027.5	novel	0	0	62	0	62	n	0.02	1	44	1	44	n	0.16	10	51	10	51	y	0.14	4	24	4	24	n	0.0100505	9.89949	up	ENSG00000272916.5	RP11-574K11.31	chr10	protein_coding		--
novel_NIR_5683	chr10	73824084	73825321	-	73824084	73837468	A5SS	ENST00000351293.7	novel	0.69	44	20	44	20	y	0.74	28	10	28	10	y	0.49	28	29	28	29	y	0.53	23	20	23	20	y	0.0264129	-6.40312	down	ENSG00000148660.20	CAMK2G	chr10	protein_coding	calcium/calmodulin-dependent protein kinase II gamma
novel_NIR_5863	chr10	91488879	91491200	+	91487778	91491200	A5SS	ENST00000446394.5	novel	0.02	1	42	1	42	n	0.05	3	53	3	53	n	0.19	11	48	11	48	n	0.15	7	39	7	39	y	0.0383286	5.4	up	ENSG00000165338.16	HECTD2	chr10	protein_coding	HECT domain containing E3 ubiquitin protein ligase 2
novel_NIR_6141	chr11	112228673	112230626	+	112228673	112233163	A3SS	ENST00000525803.1	novel	0.89	59	7	59	7	y	0.93	42	3	42	3	y	0.73	36	13	36	13	y	0.78	40	11	40	11	y	0.0439884	-4.84139	down	ENSG00000150787.7	PTS	chr11	protein_coding	6-pyruvoyltetrahydropterin synthase
novel_NIR_6251	chr11	119056167	119057027	-	119056167	119057153	A5SS	ENST00000614668.4	novel	0.13	12	77	12	77	n	0.16	13	66	13	66	y	0.05	4	75	4	75	n	0.03	3	110	3	110	n	0.0384207	-5.82435	down	ENSG00000149428.18	HYOU1	chr11	protein_coding	hypoxia up-regulated 1
novel_NIR_6265	chr11	119169042	119171356	+	119168447	119171356	A5SS	ENST00000409265.8	novel	0.6	3	2	3	2	y	0.58	7	5	7	5	y	0.89	8	1	8	1	y	0.85	11	2	11	2	y	0.0179996	12.522	up	ENSG00000160703.15	NLRX1	chr11	protein_coding	NLR family member X1
novel_NIR_6389	chr11	124625903	124626904	+	124625903;124626609	124626473;124626904	ES	ENST00000441174.7	novel	0.71	79	32	79	24;40	y	0.68	46	22	46	32;12	y	0.61	52	33.5	52	33;34	y	0.58	46	33	46	34;32	y	0.0421737	-4.71405	down	ENSG00000154144.12	TBRG1	chr11	protein_coding	transforming growth factor beta regulator 1
novel_NIR_6392	chr11	124654493	124654655	-	124649796	124654655	A3SS	ENST00000263593.7	novel	0.26	24	67	24	67	y	0.23	13	44	13	44	y	0.09	6	63	6	63	n	0.13	11	75	11	75	n	0.0383286	-5.4	down	ENSG00000110013.12	SIAE	chr11	protein_coding	sialic acid acetylesterase
novel_NIR_6719	chr11	18322740;18324296	18324236;18333060	+	18322740;18326153	18325947;18333060	MXE	ENST00000453096.6	novel	0.47	9	10	6;12	6;14	y	0.53	4	3.5	3;5	5;2	y	0.27	2	5.5	2;2	4;7	y	0.31	7	15.5	7;7	12;19	y	0.0384207	-5.82435	down	ENSG00000110768.11	GTF2H1	chr11	protein_coding	general transcription factor IIH, polypeptide 1, 62kDa
novel_NIR_7038	chr11	36396300	36400997	+	36376704	36400997	A5SS	ENST00000378867.7	novel	0.3	9	21	9	21	y	0.25	2	6	2	6	y	0.13	4	26	4	26	n	0.1	3	28	3	28	n	0.0481499	-5.48795	down	ENSG00000135362.13	PRR5L	chr11	protein_coding	proline rich 5 like
novel_NIR_7206	chr11	47285194	47289391	+	47289027	47289391	A5SS&ES	ENST00000407859.7	novel	0.12	4	30	4	30	n	0.16	5	26	5	26	y	0.03	1	35	1	35	n	0	0	16	0	16	n	0.0439076	-5	down	ENSG00000110514.18	MADD	chr11	protein_coding	MAP-kinase activating death domain
novel_NIR_7305	chr11	5346910	5505351	-	5346910	5505569	A5SS	ENST00000415970.5	novel	0.15	11	60	11	60	y	0.14	10	63	10	63	n	0.27	25	67	25	67	y	0.29	17	41	17	41	y	0.0189814	12.0748	up	ENSG00000167355.7	AC104389.28	chr11	processed_transcript		--
novel_NIR_7566	chr11	62670015	62671564	-	62670041	62671564	A3SS	ENST00000354588.7	novel	0	0	12	0	12	n	0.05	1	20	1	20	n	0.41	7	10	7	10	y	0.33	3	6	3	6	y	0.0287217	7.31399	up	ENSG00000162194.12	LBHD1	chr11	protein_coding	LBH domain containing 1
novel_NIR_7705	chr11	64801183	64801710	-	64801183;64801621	64801579;64801710	ES	ENST00000294066.6	novel	0.14	16	96	16	97;95	n	0.17	14	68.5	14	81;56	y	0	0	74.5	0	81;68	n	0.01	1	92	1	89;95	n	0.0431348	-9.48683	down	ENSG00000168067.11	MAP4K2	chr11	protein_coding	mitogen-activated protein kinase kinase kinase kinase 2
novel_NIR_7999	chr11	67353077	67353183	-	67353077	67353364	A5SS	ENST00000531239.2	novel	0.17	1	5	1	5	n	0.1	1	9	1	9	n	0.39	7	11	7	11	y	0.47	7	8	7	8	y	0.0321824	5.55025	up	ENSG00000175482.8	POLD4	chr11	protein_coding	polymerase (DNA-directed), delta 4, accessory subunit
novel_NIR_8239	chr11	72714321	72717469	-	72714321	72721850	A5SS	ENST00000334211.12	novel	0.25	20	59	20	59	n	0.21	10	37	10	37	y	0.11	7	54	7	54	n	0.06	4	58	4	58	n	0.0495775	-4.52904	down	ENSG00000186635.14	ARAP1	chr11	protein_coding	ArfGAP with RhoGAP domain, ankyrin repeat and PH domain 1
novel_NIR_8321	chr11	74775263	74789626	+	74749382	74789626	A5SS	ENST00000299563.4	novel	0	0	29	0	29	n	0.02	1	46	1	46	n	0.17	6	30	6	30	y	0.21	5	19	5	19	y	0.0342344	8.04984	up	ENSG00000166439.5	RNF169	chr11	protein_coding	ring finger protein 169
novel_NIR_8630	chr11	9288542	9295259	-	9288535	9295259	A3SS	ENST00000611268.4	novel	0.04	6	140	6	140	n	0.02	4	159	4	159	n	0.15	23	135	23	135	y	0.12	29	215	29	215	n	0.0384207	5.82435	up	ENSG00000166471.10	TMEM41B	chr11	protein_coding	transmembrane protein 41B
novel_NIR_8871	chr12	106307370	106311041	+	106302941	106311041	A5SS	ENST00000547153.5	novel	0.04	1	24	1	24	n	0.03	1	39	1	39	n	0.17	5	25	5	25	y	0.15	5	28	5	28	y	0.0212375	11.1803	up	ENSG00000166046.10	TCP11L2	chr12	protein_coding	t-complex 11, testis-specific-like 2
novel_NIR_9022	chr12	110641149	110644967	+	110641149	110641542	A3SS&ES	ENST00000377654.4	novel	0.03	1	39	1	39	n	0.06	4	64	4	64	n	0.16	13	66	13	66	y	0.14	5	32	5	32	n	0.0384207	5.82435	up	ENSG00000204852.15	TCTN1	chr12	protein_coding	tectonic family member 1
novel_NIR_9207	chr12	121453344	121467158	-	121453344	121494579	A5SS	ENST00000377069.8	novel	0.39	12	19	12	19	y	0.38	21	34	21	34	y	0.5	18	18	18	18	y	0.52	12	11	12	11	y	0.0212375	11.1803	up	ENSG00000089094.16	KDM2B	chr12	protein_coding	lysine (K)-specific demethylase 2B
novel_NIR_9308	chr12	123223127	123230261	-	123223127;123227616	123227463;123230261	ES	ENST00000606320.5	novel	0.29	28	69	28	79;59	y	0.3	28	66.5	28	87;46	y	0.18	18	83	18	87;79	y	0.19	20	85	20	76;94	y	0.00410679	-15.5563	down	ENSG00000051825.14	MPHOSPH9	chr12	protein_coding	M-phase phosphoprotein 9
novel_NIR_9680	chr12	27293749	27297710	+	27244332	27297710	A5SS	ENST00000389032.7	novel	0.05	7	122	7	122	n	0.03	4	127	4	127	n	0.14	12	73	12	73	n	0.15	15	88	15	88	y	0.0273751	9.39149	up	ENSG00000211455.7	STK38L	chr12	protein_coding	serine/threonine kinase 38 like
novel_NIR_9849	chr12	43755261	43758693	-	43755261	43758701	A5SS	ENST00000551923.5	novel	0.04	1	22	1	22	n	0	0	16	0	16	n	0.19	6	25	6	25	y	0.14	5	30	5	30	n	0.0495775	4.52904	up	ENSG00000129317.14	PUS7L	chr12	protein_coding	pseudouridylate synthase 7 homolog (S. cerevisiae)-like
novel_NIR_9983	chr12	47879115	47904955	-	47879115;47882774	47882694;47904955	ES	ENST00000549336.5	novel	0.22	16	56	16	80;32	y	0.24	15	48	15	68;28	y	0.35	18	33.5	18	45;22	y	0.38	29	46.5	29	63;30	y	0.025109	7.48845	up	ENSG00000111424.10	VDR	chr12	protein_coding	vitamin D (1,25- dihydroxyvitamin D3) receptor
novel_NIR_10200	chr12	52037443	52041810	+	52038749	52041810	5pMXE	ENST00000545748.5	novel	0.88	21	3	21	3	y	0.9	18	2	18	2	y	0.7	19	8	19	8	y	0.68	13	6	13	6	y	0.00496281	-14.1421	down	ENSG00000123358.19	NR4A1	chr12	protein_coding	nuclear receptor subfamily 4, group A, member 1
novel_NIR_10815	chr12	7115219	7118267	+	7115219	7118899	A3SS	ENST00000382215.3	novel	0.39	21	33	21	33	y	0.41	9	13	9	13	y	0.65	24	13	24	13	y	0.71	15	6	15	6	y	0.0468821	8.85438	up	ENSG00000205885.7	C1RL-AS1	chr12	antisense	C1RL antisense RNA 1
novel_NIR_10823	chr12	7119553	7120480	+	7119553	7120506	A3SS	ENST00000541775.5	novel	0.65	60	32	60	32	y	0.67	55	27	55	27	y	0.43	16	21	16	21	y	0.44	47	60	47	60	y	0.00898545	-20.1246	down	ENSG00000205885.7	C1RL-AS1	chr12	antisense	C1RL antisense RNA 1
novel_NIR_10841	chr12	71880607	71893222	+	71880607;71885021	71884811;71893222	ES	ENST00000550746.5	novel	0.04	8	217	8	249;185	n	0.07	15	201	15	248;154	n	0.16	31	163	31	224;102	y	0.14	29	175.5	29	204;147	n	0.0454248	5.26965	up	ENSG00000121749.15	TBC1D15	chr12	protein_coding	TBC1 domain family, member 15
novel_NIR_10951	chr12	88035738	88042825	+	88035738;88040265	88040148;88042825	ES	ENST00000356891.3	novel	0.31	59	133	59	108;158	y	0.29	47	113	47	95;131	y	0.23	34	113	34	90;136	y	0.21	35	132	35	100;164	y	0.0298575	-5.65685	down	ENSG00000133641.17	C12orf29	chr12	protein_coding	chromosome 12 open reading frame 29
novel_NIR_11196	chr13	110625303	110627439	+	110625278	110627439	A5SS	ENST00000309957.2	novel	0.05	3	62	3	62	n	0	0	36	0	36	n	0.29	21	51	21	51	y	0.25	16	47	16	47	y	0.0189785	7.65251	up	ENSG00000213995.11	CARKD	chr13	protein_coding	carbohydrate kinase domain containing
novel_NIR_11197	chr13	110635588	110638378	+	110635588	110637129	A3SS&ES	ENST00000309957.2	novel	0.09	5	50	5	50	n	0.1	4	36	4	36	n	0.27	8	22	8	22	y	0.24	16	51	16	51	y	0.0398973	10.1193	up	ENSG00000213995.11	CARKD	chr13	protein_coding	carbohydrate kinase domain containing
novel_NIR_11267	chr13	113461136;113462891	113462740;113474124	-	113461136	113474124	cassetteExon	ENST00000332592.7	novel	0.53	21	19	19;23	19	y	0.52	19.5	18	19;20	18	y	0.34	16.5	32	15;18	32	y	0.32	17.5	38	20;15	38	y	0.0110831	-17.4413	down	ENSG00000150401.14	DCUN1D2	chr13	protein_coding	DCN1, defective in cullin neddylation 1, domain containing 2
novel_NIR_11488	chr13	32522270	32526539	-	32522270	32527458	A5SS	ENST00000357505.10	novel	0.24	10	32	10	32	y	0.27	7	19	7	19	y	0.07	1	13	1	13	n	0.06	1	15	1	15	n	0.0324006	-12.0167	down	ENSG00000244754.8	N4BP2L2	chr13	protein_coding	NEDD4 binding protein 2-like 2
novel_NIR_12176	chr14	20316560;20320392	20320288;20325539	-	20316560;20317974	20317795;20325539	MXE	ENST00000398169.7	novel	0.07	0.5	7	1;0	0;14	n	0	0	4	0;0	0;8	n	0.88	7	1	7;7	0;2	y	1	6	0	4;8	0;0	y	0.0126915	13.0287	up	ENSG00000100814.17	CCNB1IP1	chr14	protein_coding	cyclin B1 interacting protein 1, E3 ubiquitin protein ligase
novel_NIR_12678	chr14	58427813	58429363	+	58428463	58429363	A5SS&ES	ENST00000354386.10	novel	0.05	1	19	1	19	n	0.11	1	8	1	8	n	0.62	10	6	10	6	y	0.64	9	5	9	5	y	0.0206789	17.3925	up	ENSG00000100578.14	KIAA0586	chr14	protein_coding	KIAA0586
novel_NIR_13273	chr15	101966223	101971823	+	101966223	101966522	3pMXE	ENST00000559884.5	novel	0	0	4	0	4	n	0.04	1	23	1	23	n	0.23	3	10	3	10	y	0.27	3	8	3	8	y	0.0147882	8.13173	up	ENSG00000185596.16	WASH3P	chr15	transcribed_unprocessed_pseudogene	WAS protein family homolog 3 pseudogene
novel_NIR_13981	chr15	60386086	60396280	-	60386086	60397871	A5SS	ENST00000332680.8	novel	0.03	5	150	5	150	n	0.06	7	113	7	113	n	0.19	23	98	23	98	y	0.16	23	117	23	117	y	0.0256088	6.12826	up	ENSG00000182718.16	ANXA2	chr15	protein_coding	annexin A2
novel_NIR_13993	chr15	60479398	60510408	+	60479398;60488591	60488524;60510408	ES	ENST00000559824.5	novel	1	5	0	5	0;0	y	0.75	3	1	3	1;1	y	0	0	5	0	6;4	n	0.16	3	16	3	18;14	y	0.0463537	-5.35685	down	ENSG00000245534.6	RORA-AS1	chr15	antisense	RORA antisense RNA 1
novel_NIR_14021	chr15	63062645	63065896	+	63062645;63064190	63064064;63065896	ES	ENST00000288398.10	novel	0.17	12	57.5	12	106;9	y	0.16	7	38	7	76;0	y	0.27	11	30.5	11	57;4	y	0.25	24	72.5	24	126;19	y	0.0316556	8.49706	up	ENSG00000140416.19	TPM1	chr15	protein_coding	tropomyosin 1 (alpha)
novel_NIR_14043	chr15	63775649	63779583	-	63775649	63833827	A5SS	ENST00000443617.6	novel	0.19	4	17	4	17	y	0.1	5	44	5	44	n	0.41	11	16	11	16	y	0.5	2	2	2	2	y	0.0396538	4.87118	up	ENSG00000103657.13	HERC1	chr15	protein_coding	HECT and RLD domain containing E3 ubiquitin protein ligase family member 1
novel_NIR_14141	chr15	67236820	67254224	-	67236820	67254414	A5SS	ENST00000561452.5	novel	0.38	5	8	5	8	y	0.4	4	6	4	6	y	0	0	5	0	5	n	0.05	1	19	1	19	n	0.0227122	-13.5558	down	ENSG00000103591.12	AAGAB	chr15	protein_coding	alpha- and gamma-adaptin binding protein
novel_NIR_14276	chr15	74034530	74035143	+	74034530	74042989	A3SS	ENST00000395135.7	novel	0.06	2	30	2	30	n	0.04	3	66	3	66	n	0.29	8	20	8	20	y	0.25	3	9	3	9	y	0.0255845	9.8387	up	ENSG00000140464.19	PML	chr15	protein_coding	promyelocytic leukemia
novel_NIR_14286	chr15	74339753	74340021	-	74339753	74342977	A5SS	ENST00000358632.8	novel	0.75	3	1	3	1	y	1	2	0	2	0	y	0.2	1	4	1	4	n	0	0	4	0	4	n	0.0439884	-4.84139	down	ENSG00000140459.17	CYP11A1	chr15	protein_coding	cytochrome P450, family 11, subfamily A, polypeptide 1
novel_NIR_14295	chr15	74572933	74589820	+	74572933;74573204	74573132;74589820	ES	ENST00000346246.9	novel	0	0	77.5	0	67;88	n	0.02	1	49	1	52;46	n	0.15	9	51	9	59;43	y	0.19	16	67	16	68;66	y	0.0405833	7.15542	up	ENSG00000179361.17	ARID3B	chr15	protein_coding	AT rich interactive domain 3B (BRIGHT-like)
novel_NIR_14936	chr16	14310240	14326013	+	14302597	14326013	A5SS	ENST00000570945.1	novel	0.14	1	6	1	6	n	0.13	2	13	2	13	n	0.33	5	10	5	10	y	0.31	4	9	4	9	y	0.0119719	16.5469	up	ENSG00000262454.1	RP11-65J21.3	chr16	lincRNA		--
novel_NIR_15135	chr16	1962649	1962736	-	1962270	1962736	A3SS	ENST00000530225.5	novel	0.97	237	8	237	8	y	0.84	194	36	194	36	y	0.12	4	28	4	28	n	0	0	31	0	31	n	0.0110062	-9.55244	down	ENSG00000140988.15	RPS2	chr16	protein_coding	ribosomal protein S2
novel_NIR_15142	chr16	2000256	2000409	-	2000256	2000391	A5SS	ENST00000563630.5	novel	0.36	111	194	111	194	y	0.35	115	217	115	217	y	0.39	119	185	119	185	y	0.4	128	192	128	192	y	0.0298575	5.65685	up	ENSG00000167962.12	ZNF598	chr16	protein_coding	zinc finger protein 598
novel_NIR_15467	chr16	29459199	29461382	+	29459985	29461382	5pMXE	ENST00000360423.11	novel	0.04	5	117	5	117	n	0.07	5	68	5	68	n	0.14	8	48	8	48	n	0.16	10	51	10	51	y	0.0454248	5.26965	up	ENSG00000213648.10	SULT1A4	chr16	protein_coding	sulfotransferase family, cytosolic, 1A, phenol-preferring, member 4
novel_NIR_15738	chr16	3393814;3396646	3396560;3397192	-	3393814	3397192	cassetteExon	ENST00000396846.7	novel	0.18	12	54	11;13	54	y	0.2	5.5	22	4;7	22	y	0.05	1	21	0;2	21	n	0.07	2	28	4;0	28	n	0.0116283	-9.19239	down	ENSG00000140987.19	ZSCAN32	chr16	protein_coding	zinc finger and SCAN domain containing 32
novel_NIR_15739	chr16	3396646	3397192	-	3384941	3397192	A3SS	ENST00000618425.4	novel	0.39	13	20	13	20	n	0.47	7	8	7	8	y	0.12	2	14	2	14	n	0	0	21	0	21	n	0.0474867	-5.13098	down	ENSG00000140987.19	ZSCAN32	chr16	protein_coding	zinc finger and SCAN domain containing 32
novel_NIR_15769	chr16	3643036	3651317	+	3643036	3654961	A3SS	ENST00000407479.5	novel	0	0	2	0	2	n	0.22	2	7	2	7	y	0.8	8	2	8	2	y	1	6	0	6	0	y	0.0342877	5.31412	up	ENSG00000213918.10	DNASE1	chr16	protein_coding	deoxyribonuclease I
novel_NIR_16150	chr16	659376;659859	659614;660058	+	659376	660058	cassetteExon	ENST00000549091.5	novel	0.22	15.5	56	18;13	56	y	0.2	10.5	42	11;10	42	y	0.13	10.5	72	7;14	72	n	0.15	11.5	66	11;12	66	y	0.0384761	-4.94975	down	ENSG00000161996.17	WDR90	chr16	protein_coding	WD repeat domain 90
novel_NIR_16165	chr16	66558348	66566083	+	66563217	66566083	A5SS&ES	ENST00000532838.1	novel	0.25	1	3	1	3	n	0.28	5	13	5	13	y	0	0	6	0	6	n	0.06	1	15	1	15	n	0.0418331	-7.00635	down	ENSG00000254788.6	CKLF-CMTM1	chr16	protein_coding	CKLF-CMTM1 readthrough
novel_NIR_16306	chr16	68191775	68221231	+	68191775	68221196	A3SS	ENST00000349223.9	novel	0	0	14	0	14	n	0.06	1	15	1	15	n	0.57	13	10	13	10	y	0.47	9	10	9	10	y	0.0243989	8.40343	up	ENSG00000072736.18	NFATC3	chr16	protein_coding	nuclear factor of activated T-cells, cytoplasmic, calcineurin-dependent 3
novel_NIR_16308	chr16	68191775;68221385	68221231;68226350	+	68191775;68214432	68214329;68226350	MXE	ENST00000329524.8	novel	0	0	42.5	0;0	42;43	n	0.03	0.5	14	1;0	12;16	n	0.29	7.5	18.5	13;2	21;16	y	0.26	4.5	13	9;0	6;20	n	0.00659106	12.2565	up	ENSG00000072736.18	NFATC3	chr16	protein_coding	nuclear factor of activated T-cells, cytoplasmic, calcineurin-dependent 3
novel_NIR_16341	chr16	69153680	69155871	+	69153680	69160356	A3SS	ENST00000352319.8	novel	0.12	3	21	3	21	n	0.32	6	13	6	13	n	0.74	23	8	23	8	y	0.93	28	2	28	2	y	0.0470238	4.45875	up	ENSG00000141076.17	CIRH1A	chr16	protein_coding	cirrhosis, autosomal recessive 1A (cirhin)
novel_NIR_16383	chr16	70333134	70333820	-	70317373	70333820	A3SS	ENST00000562077.5	novel	0	0	1	0	1	n	0.2	1	4	1	4	n	1	2	0	2	0	y	0.93	13	1	13	1	y	0.0497253	8.16437	up	ENSG00000261777.5	RP11-529K1.2	chr16	processed_transcript		--
novel_NIR_16715	chr16	84657913	84659760	+	84657944	84659760	A5SS	ENST00000564996.5	novel	0.03	1	33	1	33	n	0.06	2	32	2	32	n	0.36	10	18	10	18	y	0.29	9	22	9	22	y	0.0468616	7.35316	up	ENSG00000135686.12	KLHL36	chr16	protein_coding	kelch-like family member 36
novel_NIR_16752	chr16	8621775;8624118	8623853;8625496	+	8621775	8625496	cassetteExon	ENST00000381920.7	novel	0.01	0.5	33	0;1	33	n	0	0	38	0;0	38	n	0.2	5.5	22	0;11	22	n	0.19	5.5	24	2;9	24	y	0.00138217	26.8701	up	ENSG00000067365.14	METTL22	chr16	protein_coding	methyltransferase like 22
novel_NIR_16753	chr16	8624118	8625496	+	8621775	8625496	A5SS	ENST00000381920.7	novel	0.03	1	33	1	33	n	0	0	38	0	38	n	0.33	11	22	11	22	y	0.27	9	24	9	24	n	0.0316556	8.49706	up	ENSG00000067365.14	METTL22	chr16	protein_coding	methyltransferase like 22
novel_NIR_16991	chr16	89549713	89550494	+	89549336	89550494	A5SS	ENST00000620811.4	novel	0.11	8	66	8	66	n	0.13	13	84	13	84	n	0.21	17	63	17	63	y	0.2	23	94	23	94	y	0.037184	7.60263	up	ENSG00000197912.13	SPG7	chr16	protein_coding	spastic paraplegia 7 (pure and complicated autosomal recessive)
novel_NIR_17372	chr17	18857853	18865802	+	18858261	18865802	5pMXE	ENST00000536323.5	novel	0.04	1	26	1	26	n	0	0	11	0	11	n	0.43	9	12	9	12	y	0.4	12	18	12	18	y	0.00543279	15.8	up	ENSG00000141127.14	PRPSAP2	chr17	protein_coding	phosphoribosyl pyrophosphate synthetase-associated protein 2
novel_NIR_17448	chr17	20416691	20424592	+	20416691;20420605	20420379;20424592	ES	ENST00000583574.6	novel	0.55	3	2.5	3	0;5	y	0.5	4	4	4	5;3	y	0.91	10	1	10	2;0	y	0.96	26	1	26	2;0	y	0.00735412	11.5966	up	ENSG00000189423.11	USP32P3	chr17	transcribed_unprocessed_pseudogene	ubiquitin specific peptidase 32 pseudogene 3
novel_NIR_17483	chr17	2300664;2303354	2303014;2303633	-	2300664	2303633	cassetteExon	ENST00000263073.10	novel	0.61	14	9	16;12	9	y	0.57	13.5	10	19;8	10	y	0.36	9.5	17	19;0	17	n	0.42	14	19	27;1	19	n	0.0416957	-5.547	down	ENSG00000070366.13	SMG6	chr17	protein_coding	SMG6 nonsense mediated mRNA decay factor
novel_NIR_17639	chr17	29568508	29569018	+	29568830	29569018	5pMXE	ENST00000301057.7	novel	0.18	13	59	13	59	y	0.2	11	45	11	45	y	0.04	2	49	2	49	n	0	0	42	0	42	n	0.037184	-7.60263	down	ENSG00000167543.15	TP53I13	chr17	protein_coding	tumor protein p53 inducible protein 13
novel_NIR_17661	chr17	29619773	29622688	-	29619773	29621224	5pMXE	ENST00000388767.7	novel	0	0	60	0	60	n	0.04	4	88	4	88	n	0.22	13	45	13	45	y	0.26	10	29	10	29	y	0.0161301	7.77817	up	ENSG00000167549.18	CORO6	chr17	protein_coding	coronin 6
novel_NIR_17662	chr17	29619773	29622688	-	29619773;29621423	29621224;29622688	ES	ENST00000345068.9	novel	0	0	31	0	60;2	n	0.08	4	46.5	4	88;5	n	0.33	13	26.5	13	45;8	y	0.41	10	14.5	10	29;0	y	0.0281499	5.83363	up	ENSG00000167549.18	CORO6	chr17	protein_coding	coronin 6
novel_NIR_17672	chr17	2975775	2980287	+	2965643	2980287	A5SS	ENST00000540393.6	novel	0.36	58	101	58	101	y	0.32	45	96	45	96	y	0.13	21	139	21	139	n	0.15	22	126	22	126	y	0.0293856	-8.94427	down	ENSG00000132359.13	RAP1GAP2	chr17	protein_coding	RAP1 GTPase activating protein 2
novel_NIR_17868	chr17	38451525	38451626	-	38451393	38451626	A3SS	ENST00000617990.4	novel	0.38	10	16	10	16	y	0.4	4	6	4	6	y	0.62	5	3	5	3	y	0.67	6	3	6	3	y	0.0362355	9.47046	up	ENSG00000276170.4	AC124789.1	chr17	processed_transcript		--
novel_NIR_18004	chr17	41518461	41521685	-	41519872	41521685	A3SS&ES	ENST00000393976.6	novel	0.54	32	27	32	27	y	0.6	52	35	52	35	y	0.73	63	23	63	23	y	0.78	88	25	88	25	y	0.0444442	4.73736	up	ENSG00000171346.13	KRT15	chr17	protein_coding	keratin 15, type I
novel_NIR_18184	chr17	44151044	44154556	+	44151044;44152777	44152637;44154556	ES	ENST00000585683.5	novel	0.31	7	15.5	7	11;20	y	0.32	7	15	7	11;19	y	0.07	2	26	2	21;31	n	0.05	1	17.5	1	11;24	n	0.00747798	-22.8079	down	ENSG00000125319.14	C17orf53	chr17	protein_coding	chromosome 17 open reading frame 53
novel_NIR_18313	chr17	45978440	45982866	+	45978440	45987040	A3SS	ENST00000351559.9	novel	0.19	11	47	11	47	y	0.18	6	27	6	27	y	0.03	1	36	1	36	n	0	0	45	0	45	n	0.0370749	-10.7517	down	ENSG00000186868.15	MAPT	chr17	protein_coding	microtubule-associated protein tau
novel_NIR_18542	chr17	5109052	5109711	-	5109052	5109394	A5SS	ENST00000575898.5	novel	0.15	4	22	4	22	y	0.17	4	19	4	19	y	0	0	45	0	45	n	0.03	1	34	1	34	n	0.0222268	-8.04315	down	ENSG00000167840.13	ZNF232	chr17	protein_coding	zinc finger protein 232
novel_NIR_18960	chr17	72404816	72422747	-	72404816	72422785	A5SS	ENST00000578206.1	novel	1	5	0	5	0	y	0.89	17	2	17	2	y	0.33	1	2	1	2	n	0.17	1	5	1	5	n	0.0259576	-7.15886	down	ENSG00000227036.6	LINC00511	chr17	lincRNA	long intergenic non-protein coding RNA 511
novel_NIR_19174	chr17	75784984	75791760	+	75784984	75809760	A3SS	ENST00000589666.5	novel	0.36	31	55	31	55	n	0.33	34	69	34	69	y	0.6	61	41	61	41	y	0.65	31	17	31	17	y	0.0196693	9.60392	up	ENSG00000132478.9	UNK	chr17	protein_coding	unkempt family zinc finger
novel_NIR_19175	chr17	75784984;75792019	75791760;75809760	+	75784984	75809760	cassetteExon	ENST00000589666.5	novel	0.27	20	55	31;9	55	y	0.2	17	69	34;0	69	n	0.43	30.5	41	61;0	41	n	0.48	15.5	17	31;0	17	n	0.0443021	5.1149	up	ENSG00000132478.9	UNK	chr17	protein_coding	unkempt family zinc finger
novel_NIR_19519	chr17	7886333	7889664	+	7889100	7889664	5pMXE	ENST00000358181.8	novel	0.43	6	8	6	8	y	0.5	9	9	9	9	y	0.13	3	20	3	20	n	0.11	2	16	2	16	n	0.0482854	-9.47788	down	ENSG00000170004.16	CHD3	chr17	protein_coding	chromodomain helicase DNA binding protein 3
novel_NIR_19549	chr17	79082877	79083020	+	79082063	79083020	A5SS	ENST00000579016.5	novel	0.13	8	55	8	55	n	0.14	6	38	6	38	n	0.33	23	47	23	47	y	0.35	26	49	26	49	y	0.0102997	18.3358	up	ENSG00000167280.16	ENGASE	chr17	protein_coding	endo-beta-N-acetylglucosaminidase
novel_NIR_19658	chr17	81551203	81551732	-	81551203	81551928	A5SS	ENST00000327787.12	novel	0.11	4	32	4	32	n	0	0	8	0	8	n	0.71	15	6	15	6	y	0.66	21	11	21	11	y	0.0271102	10.4278	up	ENSG00000185504.16	FAAP100	chr17	protein_coding		--
novel_NIR_19719	chr17	8206934	8207176	-	8206934	8207318	A5SS	ENST00000578549.5	novel	0.05	3	61	3	61	n	0.07	5	69	5	69	n	0.19	14	61	14	61	y	0.17	12	58	12	58	y	0.0136061	8.48528	up	ENSG00000178999.12	AURKB	chr17	protein_coding	aurora kinase B
novel_NIR_19724	chr17	82128597	82151560	-	82128597;82134194	82134073;82151560	ES	ENST00000392346.6	novel	0.29	16	38.5	16	49;28	y	0.24	16	50.5	16	46;55	y	0.04	2	48.5	2	53;44	n	0.08	6	66.5	6	54;79	n	0.0264129	-6.40312	down	ENSG00000176155.18	CCDC57	chr17	protein_coding	coiled-coil domain containing 57
novel_NIR_19920	chr18	12686450;12699165	12698979;12699830	-	12686450;12697408	12691359;12699830	MXE	ENST00000423709.6	novel	0.17	2	9.5	0;4	19;0	n	0.2	4.5	18	4;5	36;0	y	0	0	20.5	0;0	41;0	n	0.04	1	22.5	2;0	45;0	n	0.026784	-6.6	down	ENSG00000101624.10	CEP76	chr18	protein_coding	centrosomal protein 76kDa
novel_NIR_19945	chr18	13760208	13762039	+	13754147	13762039	A5SS	ENST00000592764.5	novel	0.36	8	14	8	14	y	0.32	8	17	8	17	y	0.59	19	13	19	13	y	0.54	14	12	14	12	y	0.0222342	7.02782	up	ENSG00000101654.17	RNMT	chr18	protein_coding	RNA (guanine-7-) methyltransferase
novel_NIR_20232	chr18	47896809;47930446	47930252;47930800	-	47896809	47930800	cassetteExon	ENST00000402690.6	novel	0.43	19.5	26	6;33	26	y	0.45	22	27	2;42	27	y	0.32	11	23	2;20	23	y	0.35	7.5	14	0;15	14	n	0.0384207	-5.82435	down	ENSG00000175387.15	SMAD2	chr18	protein_coding	SMAD family member 2
novel_NIR_20486	chr18	79276289	79277054	+	79253541	79277054	A5SS	ENST00000426216.6	novel	0	0	29	0	29	n	0.06	2	30	2	30	n	0.32	9	19	9	19	n	0.28	11	28	11	28	y	0.025109	7.48845	up	ENSG00000166377.19	ATP9B	chr18	protein_coding	ATPase, class II, type 9B
novel_NIR_20617	chr19	11195820	11197707	-	11195820	11197485	5pMXE	ENST00000586659.5	novel	0.17	8	38	8	38	y	0.19	11	46	11	46	y	0.04	2	43	2	43	n	0	0	23	0	23	n	0.0405833	-7.15542	down	ENSG00000197256.10	KANK2	chr19	protein_coding	KN motif and ankyrin repeat domains 2
novel_NIR_20696	chr19	1235145;1235342	1235312;1235501	-	1235145	1235501	cassetteExon	ENST00000590083.5	novel	0.59	17	12	16;18	12	y	0.53	10	9	9;11	9	y	0.3	8	19	8;8	19	y	0.33	3.5	7	2;5	7	y	0.0393945	-7.30449	down	ENSG00000099625.12	C19orf26	chr19	protein_coding	chromosome 19 open reading frame 26
novel_NIR_20871	chr19	14765804	14766064	-	14765804	14772342	A5SS	ENST00000594076.5	novel	0.08	1	12	1	12	n	0.05	2	39	2	39	n	0.23	6	20	6	20	y	0.22	4	14	4	14	n	0.0398973	10.1193	up	ENSG00000127507.17	ADGRE2	chr19	protein_coding	adhesion G protein-coupled receptor E2
novel_NIR_20892	chr19	1508109	1510150	-	1508109;1508570	1508443;1510150	ES	ENST00000330475.8	novel	0.44	19	24.5	19	41;8	y	0.5	5	5	5	5;5	y	0.17	3	15	3	15;15	y	0.07	2	27.5	2	35;20	n	0.04179	-6.00245	down	ENSG00000185761.10	ADAMTSL5	chr19	protein_coding	ADAMTS-like 5
novel_NIR_21785	chr19	40205296;40205599	40205540;40205911	+	40205296	40205911	cassetteExon	ENST00000253055.7	novel	0.12	5.5	40	0;11	40	n	0.07	5.5	70	0;11	70	n	0.3	10.5	24	4;17	24	y	0.24	14.5	46	0;29	46	n	0.0491613	4.48129	up	ENSG00000130758.7	MAP3K10	chr19	protein_coding	mitogen-activated protein kinase kinase kinase 10
novel_NIR_21800	chr19	40348768	40366419	+	40348768;40365930	40365718;40366419	ES	ENST00000409735.8	novel	0.13	17	111	17	16;206	n	0.14	14	89.5	14	6;173	n	0.2	19	77.5	19	12;143	y	0.21	23	85.5	23	20;151	y	0.0100505	9.89949	up	ENSG00000105223.18	PLD3	chr19	protein_coding	phospholipase D family, member 3
novel_NIR_22288	chr19	49182867	49183078	+	49182922	49183078	A5SS	ENST00000252826.9	novel	0.15	3	17	3	17	y	0.23	3	10	3	10	y	0.6	3	2	3	2	y	0.5	7	7	7	7	y	0.0335368	5.62226	up	ENSG00000130529.15	TRPM4	chr19	protein_coding	transient receptor potential cation channel, subfamily M, member 4
novel_NIR_22570	chr19	55206955	55207126	-	55206955	55207166	A5SS	ENST00000376350.7	novel	0.29	7	17	7	17	y	0.35	6	11	6	11	y	0	0	14	0	14	n	0.04	1	23	1	23	n	0.0209751	-8.3205	down	ENSG00000080031.9	PTPRH	chr19	protein_coding	protein tyrosine phosphatase, receptor type, H
novel_NIR_22626	chr19	567624	571440	-	567648	571440	A3SS	ENST00000588908.5	novel	0.57	17	13	17	13	y	0.61	23	15	23	15	y	0.87	26	4	26	4	y	0.91	20	2	20	2	y	0.0087721	10.6066	up	ENSG00000267751.5	AC009005.2	chr19	antisense		--
novel_NIR_22664	chr19	57390114;57392948	57392756;57394188	+	57390114	57394188	cassetteExon	ENST00000597400.5	novel	0.23	9.5	32	4;15	32	y	0.27	16.5	44	0;33	44	n	0.52	22	20	0;44	20	n	0.55	23.5	19	0;47	19	n	0.00990595	11.4	up	ENSG00000188785.11	ZNF548	chr19	protein_coding	zinc finger protein 548
novel_NIR_22723	chr19	57819945;57820549	57820494;57856104	+	57819945	57856104	cassetteExon	ENST00000598031.1	novel	0.94	15	1	25;5	1	y	1	4	0	8;0	0	n	0.73	8	3	15;1	3	n	0.79	7.5	2	15;0	2	n	0.0384761	-4.94975	down	ENSG00000268750.6	CTD-2583A14.10	chr19	protein_coding		--
novel_NIR_22853	chr19	650296	651692	-	650296	651611	A5SS	ENST00000292363.9	novel	0.26	34	98	34	98	y	0.28	31	80	31	80	y	0.15	22	123	22	123	y	0.17	19	91	19	91	y	0.0161301	-7.77817	down	ENSG00000070423.17	RNF126	chr19	protein_coding	ring finger protein 126
novel_NIR_22926	chr19	8592870	8595779	-	8592870	8595762	A5SS	ENST00000270328.8	novel	0.63	12	7	12	7	y	0.6	3	2	3	2	y	0.33	3	6	3	6	y	0.38	3	5	3	5	y	0.0221702	-8.91793	down	ENSG00000142303.13	ADAMTS10	chr19	protein_coding	ADAM metallopeptidase with thrombospondin type 1 motif, 10
novel_NIR_23203	chr2	111208661	111344061	-	111233739	111344061	A3SS&ES	ENST00000609902.5	novel	0.64	18	10	18	10	n	0.68	41	19	41	19	n	0.39	16	25	16	25	n	0.36	13	23	13	23	y	0.00990595	-11.4	down	ENSG00000172965.14	MIR4435-2HG	chr2	lincRNA	MIR4435-2 host gene
novel_NIR_23215	chr2	111208936	111344061	-	111248241	111344061	3pMXE	ENST00000451884.5	novel	0.07	2	26	2	26	n	0.1	2	18	2	18	n	0.29	9	22	9	22	y	0.33	7	14	7	14	y	0.0152674	9	up	ENSG00000172965.14	MIR4435-2HG	chr2	lincRNA	MIR4435-2 host gene
novel_NIR_23241	chr2	111319588	111344061	-	111314562	111344061	A3SS	ENST00000444301.5	novel	0	0	15	0	15	n	0.06	1	16	1	16	n	0.3	3	7	3	7	y	0.4	2	3	2	3	y	0.0481499	5.48795	up	ENSG00000172965.14	MIR4435-2HG	chr2	lincRNA	MIR4435-2 host gene
novel_NIR_23581	chr2	134945975	134946101	+	134942674	134946101	A5SS	ENST00000295238.10	novel	0.41	18	26	18	26	n	0.38	14	23	14	23	n	0.22	8	29	8	29	y	0.26	11	32	11	32	n	0.0299646	-6.2	down	ENSG00000082258.12	CCNT2	chr2	protein_coding	cyclin T2
novel_NIR_23722	chr2	159259843	159275546	-	159259843;159271795	159271702;159275546	ES	ENST00000359774.8	novel	0.55	3	2.5	3	3;2	y	0.59	10	7	10	8;6	y	0.09	1	10.5	1	12;9	n	0.11	1	8.5	1	8;9	n	0.00843016	-21.019	down	ENSG00000196151.10	WDSUB1	chr2	protein_coding	WD repeat, sterile alpha motif and U-box domain containing 1
novel_NIR_24033	chr2	189782602	189783879	-	189782602	189783014	A5SS&ES	ENST00000392349.8	novel	0.33	15	31	15	31	y	0.29	8	20	8	20	y	0.04	1	27	1	27	n	0	0	7	0	7	n	0.00937887	-10.253	down	ENSG00000128699.13	ORMDL1	chr2	protein_coding	ORMDL sphingolipid biosynthesis regulator 1
novel_NIR_24695	chr2	237769818	237769943	+	237760205	237769943	A5SS	ENST00000308482.13	novel	0.65	34	18	34	18	y	0.59	38	26	38	26	n	0.92	34	3	34	3	y	0.89	39	5	39	5	y	0.0316556	8.49706	up	ENSG00000124831.18	LRRFIP1	chr2	protein_coding	leucine rich repeat (in FLII) interacting protein 1
novel_NIR_24701	chr2	23783028	23786042	-	23783028	23786027	A5SS	ENST00000238789.9	novel	0.62	16	10	16	10	y	0.64	18	10	18	10	y	0.25	9	27	9	27	y	0.32	6	13	6	13	y	0.0482854	-9.47788	down	ENSG00000119778.14	ATAD2B	chr2	protein_coding	ATPase family, AAA domain containing 2B
novel_NIR_25641	chr2	71124543	71129717	-	71124543	71130180	A5SS	ENST00000244217.5	novel	0.4	21	31	21	31	y	0.47	18	20	18	20	y	0.68	23	11	23	11	y	0.62	26	16	26	16	y	0.0449627	4.664	up	ENSG00000124370.10	MCEE	chr2	protein_coding	methylmalonyl CoA epimerase
novel_NIR_25757	chr2	74430518	74432467	-	74430518;74430677	74430616;74432467	ES	ENST00000305557.9	novel	0.04	1	26.5	1	28;25	n	0	0	39.5	0	47;32	n	0.17	6	30	6	35;25	y	0.22	2	7	2	7;7	y	0.0353057	5.46608	up	ENSG00000114993.15	RTKN	chr2	protein_coding	rhotekin
novel_NIR_25856	chr2	85354829;85355896	85355555;85356967	+	85354829;85355170	85355076;85356967	MXE	ENST00000393852.8	novel	0.32	5.5	11.5	8;3	14;9	y	0.31	4	9	8;0	18;0	n	0.59	10	7	8;12	10;4	y	0.56	7.5	6	11;4	11;1	y	0.0221384	16.4438	up	ENSG00000115459.17	ELMOD3	chr2	protein_coding	ELMO/CED-12 domain containing 3
novel_NIR_26124	chr2	99429948;99431940	99431741;99434332	-	99429948	99434332	cassetteExon	ENST00000258428.7	novel	0.85	22.5	4	1;44	4	n	0.74	28.5	10	4;53	10	y	0.49	18.5	19	10;27	19	y	0.37	22	37	3;41	37	y	0.0469464	-4.48435	down	ENSG00000135945.9	REV1	chr2	protein_coding	REV1, polymerase (DNA directed)
novel_NIR_26271	chr20	2500742	2508800	-	2500742	2508881	A5SS	ENST00000461548.1	novel	0.73	8	3	8	3	y	0.67	4	2	4	2	y	0.31	4	9	4	9	y	0.33	2	4	2	4	y	0.0324006	-12.0167	down	ENSG00000256566.1	RP4-734P14.4	chr20	protein_coding		--
novel_NIR_26282	chr20	25209925	25210003	+	25209925	25213263	A3SS	ENST00000354989.9	novel	0.2	20	79	20	79	y	0.15	9	50	9	50	n	0.03	2	65	2	65	n	0	0	49	0	49	n	0.0481499	-5.48795	down	ENSG00000197586.12	ENTPD6	chr20	protein_coding	ectonucleoside triphosphate diphosphohydrolase 6 (putative)
novel_NIR_26518	chr20	35582411;35582710	35582643;35582839	-	35582411	35582839	cassetteExon	ENST00000615531.4	novel	1	3.5	0	2;5	0	y	0.87	6.5	1	2;11	1	y	0.14	0.5	3	0;1	3	n	0.22	2	7	0;4	7	n	0.0179354	-9.89234	down	ENSG00000088340.15	FER1L4	chr20	unitary_pseudogene	fer-1-like family member 4, pseudogene (functional)
novel_NIR_26519	chr20	35582411;35582710	35582647;35582839	-	35582411	35582839	cassetteExon	ENST00000615531.4	novel	1	2.5	0	0;5	0	n	0.91	10.5	1	10;11	1	y	0.33	1.5	3	2;1	3	n	0.22	2	7	0;4	7	n	0.0121562	-9.56893	down	ENSG00000088340.15	FER1L4	chr20	unitary_pseudogene	fer-1-like family member 4, pseudogene (functional)
novel_NIR_26520	chr20	35582710	35582839	-	35582411	35582839	A3SS	ENST00000615531.4	novel	1	5	0	5	0	n	0.92	11	1	11	1	n	0.25	1	3	1	3	n	0.36	4	7	4	7	y	0.01414	-9.63131	down	ENSG00000088340.15	FER1L4	chr20	unitary_pseudogene	fer-1-like family member 4, pseudogene (functional)
novel_NIR_26592	chr20	36125527	36173764	+	36154896	36173764	5pMXE	ENST00000338074.6	novel	0.5	5	5	5	5	y	0.47	8	9	8	9	y	0.33	2	4	2	4	y	0.32	6	13	6	13	y	0.0398973	-10.1193	down	ENSG00000088367.20	EPB41L1	chr20	protein_coding	erythrocyte membrane protein band 4.1-like 1
novel_NIR_26749	chr20	41185201	41201286	-	41185201	41202283	A5SS	ENST00000544979.6	novel	0.18	7	32	7	32	y	0	0	17	0	17	n	0.75	12	4	12	4	y	0.57	13	10	13	10	y	0.0464173	4.47834	up	ENSG00000174306.21	ZHX3	chr20	protein_coding	zinc fingers and homeoboxes 3
novel_NIR_27141	chr20	58251864	58251975	-	58251864	58271363	A5SS	ENST00000244070.7	novel	0.23	10	33	10	33	y	0.19	7	29	7	29	y	0	0	27	0	27	n	0.02	1	59	1	59	n	0.0293856	-8.94427	down	ENSG00000124224.16	PPP4R1L	chr20	transcribed_unprocessed_pseudogene	protein phosphatase 4, regulatory subunit 1-like (pseudogene)
novel_NIR_27288	chr20	63535059	63535159	-	63535059	63537085	A5SS	ENST00000542869.2	novel	0.16	16	82	16	82	y	0.18	13	59	13	59	y	0.08	5	57	5	57	n	0.1	9	77	9	77	n	0.0298575	-5.65685	down	ENSG00000101213.6	PTK6	chr20	protein_coding	protein tyrosine kinase 6
novel_NIR_27302	chr20	63658459	63659233	+	63658466	63659233	A5SS	ENST00000370018.7	novel	0.28	30	79	30	79	y	0.23	15	51	15	51	y	0.1	7	66	7	66	n	0.06	3	50	3	50	n	0.0353057	-5.46608	down	ENSG00000258366.7	RTEL1	chr20	protein_coding	regulator of telomere elongation helicase 1
novel_NIR_27940	chr21	45538008	45541606	-	45538008	45542368	A5SS	ENST00000311124.8	novel	0.22	9	32	9	32	y	0.17	7	34	7	34	y	0	0	26	0	26	n	0.03	1	29	1	29	n	0.0399629	-6.17395	down	ENSG00000173638.18	SLC19A1	chr21	protein_coding	solute carrier family 19 (folate transporter), member 1
novel_NIR_28078	chr21	7755118	7771567	+	7755118;7769375	7769187;7771567	ES	ENST00000622934.3	novel	0.11	1	8.5	1	17;0	n	0.19	3	12.5	3	13;12	y	0.4	5	7.5	5	3;12	y	0.47	4	4.5	4	9;0	y	0.0343307	5.36211	up	ENSG00000273590.4	SMIM11	chr21	protein_coding	small integral membrane protein 11
novel_NIR_28307	chr22	21629407	21629543	-	21629407	21629602	A5SS	ENST00000292778.10	novel	0.52	52	48	52	48	y	0.54	68	59	68	59	y	0.4	34	50	34	50	y	0.43	50	66	50	66	y	0.0329611	-6.37905	down	ENSG00000161179.13	YDJC	chr22	protein_coding	YdjC homolog (bacterial)
novel_NIR_28313	chr22	21970406;21971061	21970980;21971877	-	21970406	21971877	cassetteExon	ENST00000357179.9	novel	0.33	37	74	29;45	74	y	0.32	25	54	24;26	54	y	0.26	14.5	42	18;11	42	y	0.24	18.5	59	19;18	59	y	0.0445338	-6.7082	down	ENSG00000100038.19	TOP3B	chr22	protein_coding	topoisomerase (DNA) III beta
novel_NIR_28396	chr22	23960381;23960794	23960691;23961020	-	23960381	23961020	cassetteExon	ENST00000290765.8	novel	0.06	4.5	66	5;4	66	n	0.07	9	117	2;16	117	n	0.17	12.5	60	14;11	60	y	0.15	7.5	43	0;15	43	n	0.0316556	8.49706	up	ENSG00000133433.10	GSTT2B	chr22	protein_coding	glutathione S-transferase theta 2B (gene/pseudogene)
novel_NIR_28417	chr22	24271598	24302195	+	24270983	24302195	A5SS	ENST00000437398.5	novel	0	0	35	0	35	n	0.03	1	28	1	28	n	0.15	4	23	4	23	y	0.2	9	35	9	35	y	0.0481499	5.48795	up	ENSG00000100014.19	SPECC1L	chr22	protein_coding	sperm antigen with calponin homology and coiled-coil domains 1-like
novel_NIR_29176	chr22	50256646	50256788	-	50256646	50256935	A5SS	ENST00000215659.12	novel	0.17	10	48	10	48	y	0.12	10	76	10	76	n	0.39	31	48	31	48	y	0.47	31	35	31	35	y	0.039236	6.04199	up	ENSG00000188130.13	MAPK12	chr22	protein_coding	mitogen-activated protein kinase 12
novel_NIR_29180	chr22	50256646;50256964	50256788;50258243	-	50256646;50257193	50257082;50258243	MXE	ENST00000395780.5	novel	0.21	5	19	10;0	0;38	n	0.16	5	25.5	10;0	2;49	n	0.44	16.5	21	31;2	0;42	y	0.41	17.5	25.5	31;4	2;49	y	0.0252224	8.23193	up	ENSG00000188130.13	MAPK12	chr22	protein_coding	mitogen-activated protein kinase 12
novel_NIR_29202	chr22	50372150;50393799	50393750;50393893	+	50372150;50392015	50388986;50393893	MXE	ENST00000216061.9	novel	0.82	9	2	8;10	4;0	y	0.78	3.5	1	2;5	1;1	y	0.4	1	1.5	0;2	2;1	n	0.45	2.5	3	0;5	6;0	n	0.00853427	-11.713	down	ENSG00000100239.15	PPP6R2	chr22	protein_coding	protein phosphatase 6, regulatory subunit 2
novel_NIR_29224	chr22	50573715;50573921	50573808;50574335	-	50573715	50574335	cassetteExon	ENST00000405237.7	novel	0.39	12	19	9;15	19	y	0.3	10.5	25	8;13	25	y	0.62	19.5	12	15;24	12	y	0.69	18	8	15;21	8	y	0.0365466	5.43776	up	ENSG00000205560.12	CPT1B	chr22	protein_coding	carnitine palmitoyltransferase 1B (muscle)
novel_NIR_29258	chr22	50784021	50785173	+	50783294	50785173	A5SS	ENST00000496652.5	novel	0.94	29	2	29	2	y	0.93	54	4	54	4	y	0.84	27	5	27	5	y	0.82	60	13	60	13	y	0.0273751	-9.39149	down	ENSG00000184319.15	RPL23AP82	chr22	transcribed_unprocessed_pseudogene	ribosomal protein L23a pseudogene 82
novel_NIR_29504	chr3	119477448;119478474	119478334;119480051	+	119477448	119480051	cassetteExon	ENST00000295588.8	novel	0.31	9	20	10;8	20	y	0.3	9	21	11;7	21	y	0.12	2	14	4;0	14	n	0.1	2	19	4;0	19	n	0.0110831	-17.4413	down	ENSG00000163389.10	POGLUT1	chr3	protein_coding	protein O-glucosyltransferase 1
novel_NIR_29739	chr3	129384218	129385296	-	129384218	129393635	A5SS	ENST00000507287.5	novel	0.57	4	3	4	3	y	0.47	14	16	14	16	y	0	0	14	0	14	n	0.14	3	19	3	19	n	0.042618	-5.23114	down	ENSG00000251474.6	RPL32P3	chr3	transcribed_unprocessed_pseudogene	ribosomal protein L32 pseudogene 3
novel_NIR_29926	chr3	138272268	138272967	+	138270132	138272967	A5SS	ENST00000538260.5	novel	0.18	10	47	10	47	y	0.17	6	29	6	29	n	0	0	74	0	74	n	0.02	1	62	1	62	n	0.0141553	-14.758	down	ENSG00000114098.17	ARMC8	chr3	protein_coding	armadillo repeat containing 8
novel_NIR_29961	chr3	140963227;140966427	140966348;140970927	+	140963227	140970927	cassetteExon	ENST00000446041.6	novel	0.31	52	118	97;7	118	y	0.35	72	136	129;15	136	y	0.22	45	162	87;3	162	y	0.18	53.5	239	102;5	239	y	0.044221	-4.59619	down	ENSG00000114120.11	SLC25A36	chr3	protein_coding	solute carrier family 25 (pyrimidine nucleotide carrier), member 36
novel_NIR_30214	chr3	157153156	157157011	-	157153156	157158866	A5SS	ENST00000461804.5	novel	0.65	106	58	106	58	y	0.62	91	55	91	55	y	0.54	87	75	87	75	y	0.52	117	107	117	107	y	0.0384207	-5.82435	down	ENSG00000163660.11	CCNL1	chr3	protein_coding	cyclin L1
novel_NIR_30597	chr3	195888606	195896053	-	195888606	195892411	5pMXE	ENST00000428187.5	novel	0.13	3	20	3	20	n	0	0	7	0	7	n	0.89	8	1	8	1	y	0.72	21	8	21	8	y	0.0240644	6.91559	up	ENSG00000061938.16	TNK2	chr3	protein_coding	tyrosine kinase, non-receptor, 2
novel_NIR_30689	chr3	197748445	197749269	-	197718130	197749269	A3SS	ENST00000273582.9	novel	0.92	12	1	12	1	y	1	18	0	18	0	y	0.65	13	7	13	7	y	0.7	7	3	7	3	y	0.039236	-6.04199	down	ENSG00000145016.13	KIAA0226	chr3	protein_coding	KIAA0226
novel_NIR_30728	chr3	23962605;23963330	23963115;23964977	+	23962605	23964977	cassetteExon	ENST00000312521.8	novel	0.02	1.5	76	2;1	76	n	0.04	4.5	101	0;9	101	n	0.13	9.5	66	15;4	66	n	0.16	19	101	10;28	101	y	0.0329611	6.37905	up	ENSG00000174738.12	NR1D2	chr3	protein_coding	nuclear receptor subfamily 1, group D, member 2
novel_NIR_31204	chr3	49471049	49510419	+	49476905	49510419	A5SS&ES	ENST00000538711.5	novel	0.24	6	19	6	19	y	0.3	6	14	6	14	y	0.03	1	32	1	32	n	0.1	3	28	3	28	n	0.0490518	-4.44707	down	ENSG00000173402.11	DAG1	chr3	protein_coding	dystroglycan 1 (dystrophin-associated glycoprotein 1)
novel_NIR_31227	chr3	49700709	49701533	+	49700709	49701491	A3SS	ENST00000327697.10	novel	0.07	5	69	5	69	n	0.08	7	77	7	77	n	0.23	17	56	17	56	y	0.21	16	59	16	59	y	0.0170999	12.9692	up	ENSG00000164068.15	RNF123	chr3	protein_coding	ring finger protein 123
novel_NIR_31335	chr3	50571801	50572077	+	50571801	50572115	A3SS	ENST00000434410.5	novel	0.18	10	46	10	46	y	0.17	7	35	7	35	y	0.13	10	67	10	67	n	0.14	6	38	6	38	n	0.0298575	-5.65685	down	ENSG00000114735.9	HEMK1	chr3	protein_coding	HemK methyltransferase family member 1
novel_NIR_31426	chr3	52682233	52685749	-	52679723	52685749	A3SS	ENST00000394830.7	novel	0.38	3	5	3	5	y	0.25	1	3	1	3	n	0.7	7	3	7	3	n	0.82	9	2	9	2	y	0.0378054	5.03058	up	ENSG00000163939.18	PBRM1	chr3	protein_coding	polybromo 1
novel_NIR_31668	chr3	9364193	9365016	+	9363728	9365016	A5SS	ENST00000515662.6	novel	0.6	3	2	3	2	y	0.67	12	6	12	6	y	0.38	3	5	3	5	n	0.29	2	5	2	5	y	0.0387669	-5.26235	down	ENSG00000134077.15	THUMPD3	chr3	protein_coding	THUMP domain containing 3
novel_NIR_32389	chr4	184011423;184011635	184011587;184017089	+	184011423	184017089	cassetteExon	ENST00000308497.8	novel	0.84	26	5	22;30	5	y	0.86	6	1	5;7	1	y	0.67	14	7	11;17	7	y	0.68	12.5	6	15;10	6	y	0.012987	-15.6525	down	ENSG00000173320.9	STOX2	chr4	protein_coding	storkhead box 2
novel_NIR_32597	chr4	39045096	39062562	+	39045096	39062559	A3SS	ENST00000261425.7	novel	0.36	5	9	5	9	y	0.39	7	11	7	11	y	0	0	7	0	7	n	0.07	1	14	1	14	n	0.036155	-8.92884	down	ENSG00000109790.16	KLHL5	chr4	protein_coding	kelch-like family member 5
novel_NIR_32681	chr4	444432	473981	-	444432;472701	472575;473981	ES	ENST00000506646.5	novel	0.04	2	54	2	30;78	n	0	0	46.5	0	43;50	n	0.18	14	63.5	14	27;100	y	0.14	7	41.5	7	25;58	n	0.0384761	4.94975	up	ENSG00000182903.15	ZNF721	chr4	protein_coding	zinc finger protein 721
novel_NIR_32820	chr4	6674637	6674993	+	6674706	6674993	A5SS	ENST00000307533.10	novel	0.6	9	6	9	6	y	0.55	18	15	18	15	y	0.36	13	23	13	23	y	0.28	7	18	7	18	y	0.0469709	-5.40599	down	ENSG00000170846.15	AC093323.3	chr4	lincRNA		--
novel_NIR_33056	chr4	86784609	86785231	+	86784558	86785231	A5SS	ENST00000427191.6	novel	0.24	21	66	21	66	y	0.21	19	70	19	70	y	0.1	7	65	7	65	n	0.08	6	73	6	73	n	0.025109	-7.48845	down	ENSG00000163629.12	PTPN13	chr4	protein_coding	protein tyrosine phosphatase, non-receptor type 13 (APO-1/CD95 (Fas)-associated phosphatase)
novel_NIR_33200	chr5	103184744	103190842	+	103184744;103186439	103186320;103190842	ES	ENST00000321521.13	novel	0.79	75	20	75	24;16	y	0.78	80	22	80	22;22	y	0.86	73	11.5	73	16;7	y	0.85	61	11	61	7;15	y	0.0100505	9.89949	up	ENSG00000145725.19	PPIP5K2	chr5	protein_coding	diphosphoinositol pentakisphosphate kinase 2
novel_NIR_33256	chr5	113001674	113007938	+	113001674	113003942	A3SS&ES	ENST00000515408.5	novel	0.04	1	25	1	25	n	0	0	52	0	52	n	0.18	11	50	11	50	y	0.23	11	37	11	37	y	0.0318977	5.77843	up	ENSG00000172795.15	DCP2	chr5	protein_coding	decapping mRNA 2
novel_NIR_33257	chr5	113001674	113007938	+	113001674;113004077	113003942;113007938	ES	ENST00000389063.2	novel	0.03	1	28	1	25;31	n	0	0	42.5	0	52;33	n	0.17	11	52.5	11	50;55	y	0.2	11	43	11	37;49	y	0.0152164	8.01388	up	ENSG00000172795.15	DCP2	chr5	protein_coding	decapping mRNA 2
novel_NIR_33310	chr5	123002004	123003661	+	123002004	123007682	A3SS	ENST00000261369.8	novel	0.04	2	44	2	44	n	0.05	2	40	2	40	n	0.15	5	28	5	28	y	0.13	6	41	6	41	n	0.0316556	8.49706	up	ENSG00000064652.10	SNX24	chr5	protein_coding	sorting nexin 24
novel_NIR_33562	chr5	138166610	138167934	-	138166108	138167934	A3SS	ENST00000411594.6	novel	0.35	22	41	22	41	y	0.41	29	41	29	41	y	0.09	4	39	4	39	n	0.11	6	48	6	48	n	0.0468821	-8.85438	down	ENSG00000112983.17	BRD8	chr5	protein_coding	bromodomain containing 8
novel_NIR_33725	chr5	141934586	141936854	+	141934586	141937198	A3SS	ENST00000432126.6	novel	0.03	1	33	1	33	n	0	0	42	0	42	n	0.26	11	32	11	32	n	0.21	12	44	12	44	y	0.0290071	7.54594	up	ENSG00000081791.8	KIAA0141	chr5	protein_coding	KIAA0141
novel_NIR_34394	chr5	32097380;32100963	32100862;32101105	+	32097380;32098634	32098364;32101105	MXE	ENST00000438447.1	novel	0.13	3.5	23	0;7	41;5	n	0.15	6.5	36.5	0;13	41;32	n	0.32	10.5	22	3;18	34;10	y	0.3	10.5	25	0;21	39;11	n	0.0068494	12.0208	up	ENSG00000133401.15	PDZD2	chr5	protein_coding	PDZ domain containing 2
novel_NIR_34408	chr5	32274122	32312758	-	32274122;32276742	32276682;32312758	ES	ENST00000280285.9	novel	0.18	13	60	13	65;55	y	0.17	17	85	17	94;76	y	0.02	2	80	2	79;81	n	0.03	3	107.5	3	107;108	n	0.00221484	-21.2132	down	ENSG00000150712.10	MTMR12	chr5	protein_coding	myotubularin related protein 12
novel_NIR_34565	chr5	41925498	41929697	+	41925498;41927248	41927013;41929697	ES	ENST00000296812.6	novel	0.14	7	42.5	7	22;63	n	0.17	9	43	9	32;54	y	0.27	18	47.5	18	36;59	y	0.3	12	28.5	12	19;38	y	0.0256088	6.12826	up	ENSG00000151876.12	FBXO4	chr5	protein_coding	F-box protein 4
novel_NIR_34882	chr5	70225795	70516308	-	70225795	70258882	5pMXE	ENST00000514522.2	novel	0.52	50	46	50	46	y	0.57	24	18	24	18	y	0.28	17	43	17	43	y	0.31	29	65	29	65	y	0.0236176	-8.57493	down	ENSG00000253816.3	RP11-1415C14.3	chr5	unprocessed_pseudogene		--
novel_NIR_35759	chr6	152122676	152132122	-	152122676;152130778	152130720;152132122	ES	ENST00000367255.9	novel	0.2	17	66	17	77;55	y	0.17	13	63	13	59;67	y	0.33	24	49.5	24	62;37	y	0.32	18	39	18	39;39	y	0.0468821	8.85438	up	ENSG00000131018.22	SYNE1	chr6	protein_coding	spectrin repeat containing, nuclear envelope 1
novel_NIR_35790	chr6	157110561	157148624	+	157110561;157133207	157133028;157148624	ES	ENST00000346085.9	novel	0	0	32	0	32;32	n	0.03	1	37.5	1	24;51	n	0.21	9	33	9	41;25	y	0.27	11	29.5	11	13;46	y	0.0445338	6.7082	up	ENSG00000049618.21	ARID1B	chr6	protein_coding	AT rich interactive domain 1B (SWI1-like)
novel_NIR_35842	chr6	159790060	159790940	+	159790639	159790940	5pMXE	ENST00000367034.4	novel	0.3	181	427	181	427	y	0.32	162	338	162	338	y	0.24	102	331	102	331	y	0.23	126	419	126	419	y	0.0445338	-6.7082	down	ENSG00000112110.9	MRPL18	chr6	protein_coding	mitochondrial ribosomal protein L18
novel_NIR_35902	chr6	165902883	165910808	-	165909080	165910808	3pMXE	ENST00000444465.1	novel	0.12	8	61	8	61	n	0.15	5	29	5	29	y	0.28	16	42	16	42	y	0.33	18	37	18	37	y	0.0437537	5.83095	up	ENSG00000223414.2	LINC00473	chr6	lincRNA	long intergenic non-protein coding RNA 473
novel_NIR_36005	chr6	18171479	18197057	+	18171479;18185810	18185772;18197057	ES	ENST00000297792.9	novel	0.19	17	70.5	17	121;20	y	0.2	17	67	17	118;16	y	0.1	11	95	11	159;31	n	0.09	9	94.5	9	174;15	n	0.00496281	-14.1421	down	ENSG00000165097.13	KDM1B	chr6	protein_coding	lysine (K)-specific demethylase 1B
novel_NIR_36151	chr6	28249834	28250865	-	28249834	28251558	A5SS	ENST00000377294.2	novel	0.05	1	21	1	21	n	0	0	12	0	12	n	0.25	5	15	5	15	n	0.23	3	10	3	10	y	0.0452056	7.9849	up	ENSG00000187626.8	ZKSCAN4	chr6	protein_coding	zinc finger with KRAB and SCAN domains 4
novel_NIR_36308	chr6	30715178;30717083	30717038;30717245	-	30715178	30717245	cassetteExon	ENST00000376406.7	novel	0.24	12.5	39	3;22	39	y	0.23	17.5	60	0;35	60	n	0.16	8	42	0;16	42	n	0.14	5	30	0;10	30	n	0.037184	-7.60263	down	ENSG00000137337.14	MDC1	chr6	protein_coding	mediator of DNA-damage checkpoint 1
novel_NIR_36402	chr6	31744581	31747387	+	31744581;31745319	31745237;31747387	ES	ENST00000375755.7	novel	0.89	107	13.5	107	7;20	y	0.91	59	6	59	0;12	y	0.79	68	18	68	21;15	y	0.8	78	19.5	78	9;30	y	0.0273751	-9.39149	down	ENSG00000204410.14	MSH5	chr6	protein_coding	mutS homolog 5
novel_NIR_36457	chr6	32153636	32154196	+	32153636	32153999	A3SS	ENST00000395523.5	novel	0.97	36	1	36	1	y	0.95	40	2	40	2	y	0.73	32	12	32	12	y	0.69	25	11	25	11	y	0.0212375	-11.1803	down	ENSG00000221988.12	PPT2	chr6	protein_coding	palmitoyl-protein thioesterase 2
novel_NIR_36658	chr6	37291357	37312880	+	37291357	37312918	A3SS	ENST00000373491.3	novel	0.23	10	33	10	33	y	0.22	13	47	13	47	y	0.03	1	39	1	39	n	0	0	40	0	40	n	0.0286962	-13.2816	down	ENSG00000065491.8	TBC1D22B	chr6	protein_coding	TBC1 domain family, member 22B
novel_NIR_36663	chr6	37820016	38061593	+	37820016;37929999	37929959;38061593	ES	ENST00000287218.8	novel	0.17	17	86	17	55;117	y	0.18	10	47	10	33;61	y	0.13	9	59	9	42;76	n	0.12	10	70.5	10	42;99	n	0.0194193	-7.07107	down	ENSG00000156639.11	ZFAND3	chr6	protein_coding	zinc finger, AN1-type domain 3
novel_NIR_36679	chr6	39113720	39114883	-	39105776	39114883	A3SS	ENST00000229903.4	novel	0.04	1	25	1	25	n	0.11	1	8	1	8	n	0.33	2	4	2	4	y	0.36	4	7	4	7	y	0.0491861	7.09055	up	ENSG00000112167.9	SAYSD1	chr6	protein_coding	SAYSVFN motif domain containing 1
novel_NIR_36913	chr6	54846404	54870187	+	54846826	54870187	5pMXE	ENST00000306858.7	novel	0.33	2	4	2	4	y	0.3	3	7	3	7	y	0.07	2	28	2	28	n	0	0	11	0	11	n	0.0468616	-7.35316	down	ENSG00000168143.8	FAM83B	chr6	protein_coding	family with sequence similarity 83, member B
novel_NIR_36922	chr6	56609344;56609575	56609465;56610427	-	56609344	56610427	cassetteExon	ENST00000361203.7	novel	0	0	7	0;0	7	n	0.06	0.5	8	1;0	8	n	0.24	2.5	8	3;2	8	y	0.29	2	5	4;0	5	n	0.0285923	6.01773	up	ENSG00000151914.17	DST	chr6	protein_coding	dystonin
novel_NIR_36960	chr6	63680161	63691737	+	63680161	63684129	3pMXE	ENST00000509330.5	novel	0.21	23	89	23	89	y	0.19	25	109	25	109	y	0.02	3	136	3	136	n	0.05	7	132	7	132	n	0.0178144	-9.15255	down	ENSG00000118482.11	PHF3	chr6	protein_coding	PHD finger protein 3
novel_NIR_36961	chr6	63680161	63691737	+	63680161;63685911	63684129;63691737	ES	ENST00000262043.7	novel	0.2	23	90	23	89;91	y	0.18	25	114.5	25	109;120	y	0.02	3	125.5	3	136;115	n	0.05	7	132.5	7	132;133	n	0.0198301	-8.59785	down	ENSG00000118482.11	PHF3	chr6	protein_coding	PHD finger protein 3
novel_NIR_37311	chr7	101548555	101549171	+	101547239	101549171	A5SS	ENST00000313669.11	novel	0.5	3	3	3	3	y	0.38	11	18	11	18	y	0.08	1	11	1	11	n	0	0	4	0	4	n	0.0416957	-5.547	down	ENSG00000160963.13	COL26A1	chr7	protein_coding	collagen, type XXVI, alpha 1
novel_NIR_37432	chr7	105014535	105040839	+	105014535;105038199	105038126;105040839	ES	ENST00000311117.7	novel	0.69	58	26	58	19;33	y	0.67	55	26.5	55	24;29	y	0.6	38	25	38	22;28	y	0.59	64	45	64	49;41	y	0.037184	-7.60263	down	ENSG00000005483.19	KMT2E	chr7	protein_coding	lysine (K)-specific methyltransferase 2E
novel_NIR_37475	chr7	107564209	107567050	+	107564209;107564676	107564588;107567050	ES	ENST00000265720.7	novel	0.1	7	63	7	22;104	n	0.11	8	64	8	45;83	n	0.21	15	57.5	15	21;94	y	0.19	10	43	10	19;67	y	0.0316556	8.49706	up	ENSG00000105865.10	DUS4L	chr7	protein_coding	dihydrouridine synthase 4-like (S. cerevisiae)
novel_NIR_37486	chr7	107613432;107616389	107616247;107618328	+	107613432;107613732	107613654;107618328	MXE	ENST00000445771.6	novel	0.09	0.5	5	0;1	2;8	n	0	0	7	0;0	7;7	n	0.45	5	6	2;8	3;9	y	0.35	3.5	6.5	0;7	8;5	n	0.034884	5.27739	up	ENSG00000075790.10	BCAP29	chr7	protein_coding	B-cell receptor-associated protein 29
novel_NIR_37626	chr7	127377329	127391497	-	127377329;127386155	127386060;127391497	ES	ENST00000393313.5	novel	0.02	1	56.5	1	71;42	n	0.08	4	46.5	4	57;36	n	0.32	26	55	26	75;35	y	0.25	22	67	22	82;52	y	0.038166	5.09787	up	ENSG00000048405.9	ZNF800	chr7	protein_coding	zinc finger protein 800
novel_NIR_37870	chr7	143621503;143707713	143707456;143719683	+	143621503;143703617	143702981;143719683	MXE	ENST00000357344.8	novel	0.09	3	31.5	0;6	13;50	n	0.08	3	36.5	0;6	31;42	n	0.2	4	16	8;0	13;19	n	0.22	9.5	34	4;15	22;46	y	0.0212375	11.1803	up	ENSG00000170379.19	TCAF2	chr7	protein_coding	TRPM8 channel-associated factor 2
novel_NIR_38406	chr7	30448381;30451073	30450918;30451216	-	30448381	30451216	cassetteExon	ENST00000222823.8	novel	0.07	2.5	32	3;2	32	n	0.03	0.5	14	1;0	14	n	0.42	5	7	9;1	7	n	0.41	12	17	9;15	17	y	0.0258473	17.7051	up	ENSG00000106100.10	NOD1	chr7	protein_coding	nucleotide-binding oligomerization domain containing 1
novel_NIR_38483	chr7	32930108;32942510	32942320;32942870	-	32930108;32933896	32933814;32942870	MXE	ENST00000381639.3	novel	0	0	4	0;0	7;1	n	0.08	0.5	5.5	1;0	10;1	n	0.39	3.5	5.5	3;4	9;2	y	0.32	5	10.5	10;0	16;5	n	0.0284447	5.92654	up	ENSG00000205763.13	RP9P	chr7	transcribed_unprocessed_pseudogene	retinitis pigmentosa 9 pseudogene
novel_NIR_38742	chr7	50703908;50705323	50705194;50732272	-	50703908	50732272	cassetteExon	ENST00000398812.6	novel	0.07	5	63	0;10	63	n	0.06	6	98	0;12	98	n	0.14	9.5	58	0;19	58	n	0.15	8.5	49	6;11	49	y	0.00772212	11.3137	up	ENSG00000106070.17	GRB10	chr7	protein_coding	growth factor receptor-bound protein 10
novel_NIR_39026	chr7	6730301	6731834	+	6730301	6730634	A3SS&ES	ENST00000486256.5	novel	0.67	2	1	2	1	y	0.57	4	3	4	3	y	0.17	2	10	2	10	y	0.25	3	9	3	9	y	0.0264129	-6.40312	down	ENSG00000187953.10	PMS2CL	chr7	transcribed_unprocessed_pseudogene	PMS2 C-terminal like pseudogene
novel_NIR_39455	chr7	98246165	98251419	-	98246165	98251394	A5SS	ENST00000447648.6	novel	0.31	12	27	12	27	y	0.33	10	20	10	20	y	0.42	25	35	25	35	y	0.43	13	17	13	17	y	0.0273751	9.39149	up	ENSG00000205356.9	TECPR1	chr7	protein_coding	tectonin beta-propeller repeat containing 1
novel_NIR_39494	chr7	99506458;99507060	99506578;99512453	+	99506458	99512453	cassetteExon	ENST00000326775.9	novel	0.21	13	49	1;25	49	n	0.18	8.5	40	3;14	40	y	0.01	1	84	0;2	84	n	0.06	4	60	0;8	60	n	0.0481499	-5.48795	down	ENSG00000196652.11	ZKSCAN5	chr7	protein_coding	zinc finger with KRAB and SCAN domains 5
novel_NIR_39811	chr8	127794734;127796071	127795894;127890589	+	127794734	127890589	cassetteExon	ENST00000521951.1	novel	0.25	13.5	40	19;8	40	y	0.26	11.5	32	4;19	32	y	0.14	10.5	66	4;17	66	n	0.12	11	82	3;19	82	n	0.0212375	-11.1803	down	ENSG00000249859.7	PVT1	chr8	lincRNA	Pvt1 oncogene (non-protein coding)
novel_NIR_39887	chr8	129871496;129880458	129880376;129903312	-	129871496	129903312	cassetteExon	ENST00000522941.5	novel	0.39	14	22	8;20	22	y	0.33	2.5	5	0;5	5	n	0.15	4	23	0;8	23	n	0.09	2	21	0;4	21	n	0.0298575	-5.65685	down	ENSG00000153310.18	FAM49B	chr8	protein_coding	family with sequence similarity 49, member B
novel_NIR_39984	chr8	141144259;141150348	141150286;141150834	+	141144259	141150834	cassetteExon	ENST00000262585.6	novel	0.04	1.5	37	0;3	37	n	0	0	66	0;0	66	n	0.24	5	16	2;8	16	y	0.31	8.5	19	0;17	19	n	0.0410051	6.32577	up	ENSG00000105339.10	DENND3	chr8	protein_coding	DENN/MADD domain containing 3
novel_NIR_40028	chr8	143249499	143249690	+	143247749	143249690	A5SS	ENST00000520584.5	novel	1	4	0	4	0	y	0.8	4	1	4	1	y	0.18	2	9	2	9	y	0.38	3	5	3	5	y	0.0482914	-4.38406	down	ENSG00000181638.17	ZFP41	chr8	protein_coding	ZFP41 zinc finger protein
novel_NIR_40062	chr8	143380783	143381572	+	143380783;143381344	143381268;143381572	ES	ENST00000620174.1	novel	0.2	8	32.5	8	23;42	y	0.22	5	18	5	13;23	y	0.03	1	30	1	32;28	n	0.07	2	28	2	29;27	n	0.0405833	-7.15542	down	ENSG00000158106.12	RHPN1	chr8	protein_coding	rhophilin, Rho GTPase binding protein 1
novel_NIR_40090	chr8	143586852	143593875	-	143586852	143592715	A5SS&ES	ENST00000524624.5	novel	0.86	6	1	6	1	y	1	8	0	8	0	y	0.21	3	11	3	11	y	0	0	6	0	6	n	0.0316214	-6.53754	down	ENSG00000104529.17	EEF1D	chr8	protein_coding	eukaryotic translation elongation factor 1 delta (guanine nucleotide exchange protein)
novel_NIR_40194	chr8	144148076	144160970	+	144148076	144163771	A3SS	ENST00000423230.6	novel	0.35	7	13	7	13	y	0.34	12	23	12	23	y	0.12	2	14	2	14	n	0.09	4	43	4	43	n	0.0244004	-15.1789	down	ENSG00000179832.17	MROH1	chr8	protein_coding	maestro heat-like repeat family member 1
novel_NIR_40196	chr8	144200541	144211793	+	144200541	144212994	A3SS	ENST00000423230.6	novel	0.15	3	17	3	17	y	0	0	8	0	8	n	0.6	9	6	9	6	n	0.67	4	2	4	2	n	0.0477414	6.76617	up	ENSG00000179832.17	MROH1	chr8	protein_coding	maestro heat-like repeat family member 1
novel_NIR_40200	chr8	144200541;144211912	144211793;144212994	+	144200541	144212994	cassetteExon	ENST00000423230.6	novel	0.08	1.5	17	3;0	17	n	0	0	8	0;0	8	n	0.6	9	6	9;9	6	y	0.5	2	2	4;0	2	n	0.0176142	7.96486	up	ENSG00000179832.17	MROH1	chr8	protein_coding	maestro heat-like repeat family member 1
novel_NIR_40441	chr8	22539936	22540615	+	22533018	22540615	A5SS	ENST00000289963.12	novel	0.27	7	19	7	19	y	0.31	10	22	10	22	y	0.04	1	24	1	24	n	0.08	4	49	4	49	n	0.0147882	-8.13173	down	ENSG00000120910.14	PPP3CC	chr8	protein_coding	protein phosphatase 3, catalytic subunit, gamma isozyme
novel_NIR_40741	chr8	42887871	42889303	-	42887871	42896254	A5SS	ENST00000534961.5	novel	1	8	0	8	0	y	0.86	6	1	6	1	y	0.11	1	8	1	8	n	0.25	1	3	1	3	n	0.0169798	-7.57614	down	ENSG00000120925.13	RNF170	chr8	protein_coding	ring finger protein 170
novel_NIR_40858	chr8	668782	673289	-	668792	673289	A3SS	ENST00000522706.5	novel	0.21	24	89	24	89	y	0.19	9	38	9	38	y	0.11	6	49	6	49	n	0.1	5	44	5	44	n	0.0316556	-8.49706	down	ENSG00000104714.13	ERICH1	chr8	protein_coding	glutamate-rich 1
novel_NIR_41067	chr8	93737355;93740696	93740629;93740881	-	93737355	93740881	cassetteExon	ENST00000399300.6	novel	0.35	16.5	30	18;15	30	y	0.32	32	68	40;24	68	y	0.45	36.5	45	47;26	45	y	0.48	32	35	38;26	35	y	0.0256088	6.12826	up	ENSG00000183808.11	RBM12B	chr8	protein_coding	RNA binding motif protein 12B
novel_NIR_41307	chr9	114617301	114624136	+	114617301	114624350	A3SS	ENST00000288502.8	novel	0.17	8	40	8	40	y	0.15	9	53	9	53	y	0.03	2	61	2	61	n	0.04	2	53	2	53	n	0.0212375	-11.1803	down	ENSG00000157693.14	C9orf91	chr9	protein_coding	chromosome 9 open reading frame 91
novel_NIR_41596	chr9	127896332	127912268	-	127896332	127897956	5pMXE	ENST00000291839.9	novel	0.13	9	60	9	60	n	0.17	8	38	8	38	y	0.04	2	45	2	45	n	0	0	57	0	57	n	0.044221	-4.59619	down	ENSG00000160408.14	ST6GALNAC6	chr9	protein_coding	ST6 (alpha-N-acetyl-neuraminyl-2,3-beta-galactosyl-1,3)-N-acetylgalactosaminide alpha-2,6-sialyltransferase 6
novel_NIR_41597	chr9	127896332	127912268	-	127896332	127899503	5pMXE	ENST00000373144.7	novel	0.5	9	9	9	9	y	0.44	8	10	8	10	y	0.05	2	36	2	36	n	0	0	16	0	16	n	0.00852841	-11.3953	down	ENSG00000160408.14	ST6GALNAC6	chr9	protein_coding	ST6 (alpha-N-acetyl-neuraminyl-2,3-beta-galactosyl-1,3)-N-acetylgalactosaminide alpha-2,6-sialyltransferase 6
novel_NIR_41654	chr9	128724635;128730248	128730064;128732842	+	128724635	128732842	cassetteExon	ENST00000443631.1	novel	0.16	8	42	10;6	42	y	0.14	5	32	4;6	32	n	0.04	1.5	34	2;1	34	n	0.02	0.5	25	1;0	25	n	0.0136061	-8.48528	down	ENSG00000223478.1	RP11-545E17.3	chr9	antisense		--
novel_NIR_41784	chr9	131643417	131650810	-	131643417;131650242	131650129;131650810	ES	ENST00000372189.7	novel	0.38	60	97.5	60	95;100	y	0.37	36	62.5	36	64;61	y	0.48	82	89.5	82	100;79	y	0.47	63	70.5	63	75;66	y	0.00496281	14.1421	up	ENSG00000107263.18	RAPGEF1	chr9	protein_coding	Rap guanine nucleotide exchange factor (GEF) 1
novel_NIR_41887	chr9	135482825	135483950	+	135483553	135483950	5pMXE	ENST00000401470.3	novel	0.03	2	62	2	62	n	0.05	3	55	3	55	n	0.16	12	61	12	61	y	0.2	16	66	16	66	y	0.0491686	6.26099	up	ENSG00000196422.10	PPP1R26	chr9	protein_coding	protein phosphatase 1, regulatory subunit 26
novel_NIR_41892	chr9	135561897	135562820	+	135561897;135562433	135562294;135562820	ES	ENST00000611414.4	novel	0.08	1	12	1	18;6	n	0	0	1.5	0	1;2	n	0.91	5	0.5	5	0;1	y	0.8	2	0.5	2	0;1	y	0.00952993	11.984	up	ENSG00000122133.16	PAEP	chr9	protein_coding	progestagen-associated endometrial protein
novel_NIR_41933	chr9	136477684	136482938	-	136477684	136483510	A5SS	ENST00000290037.10	novel	0.91	186	18	186	18	y	0.89	219	26	219	26	y	0.82	182	40	182	40	y	0.83	173	36	173	36	y	0.0445338	-6.7082	down	ENSG00000148396.18	SEC16A	chr9	protein_coding	SEC16 homolog A (S. cerevisiae)
novel_NIR_42131	chr9	17791334;17791636	17791578;17793367	+	17791334	17793367	cassetteExon	ENST00000380607.4	novel	0	0	17	0;0	17	n	0.07	1.5	21	2;1	21	n	0.47	4.5	5	8;1	5	n	0.39	4.5	7	3;6	7	y	0.0184958	7.43169	up	ENSG00000107295.9	SH3GL2	chr9	protein_coding	SH3-domain GRB2-like 2
novel_NIR_42144	chr9	2017799	2028987	+	2015404	2028987	A5SS	ENST00000357248.6	novel	0.04	2	45	2	45	n	0.1	4	38	4	38	n	0.24	8	26	8	26	y	0.28	7	18	7	18	y	0.0454248	5.26965	up	ENSG00000080503.19	SMARCA2	chr9	protein_coding	SWI/SNF related, matrix associated, actin dependent regulator of chromatin, subfamily a, member 2
novel_NIR_42297	chr9	34290389	34306252	-	34271930	34306252	A3SS	ENST00000379174.7	novel	0.45	5	6	5	6	y	0.5	4	4	4	4	y	0.93	14	1	14	1	y	1	4	0	4	0	y	0.0107771	11.3923	up	ENSG00000186638.15	KIF24	chr9	protein_coding	kinesin family member 24
novel_NIR_42301	chr9	34319623	34329106	-	34311371	34329106	A3SS	ENST00000379166.2	novel	0.27	6	16	6	16	y	0.25	3	9	3	9	y	0	0	11	0	11	n	0.04	1	25	1	25	n	0.0225398	-10.7331	down	ENSG00000186638.15	KIF24	chr9	protein_coding	kinesin family member 24
novel_NIR_42619	chr9	65288015	65289658	-	65288015;65288532	65288403;65289658	ES	ENST00000445695.1	novel	0.13	11	71	11	15;127	n	0.17	9	44	9	3;85	y	0.35	33	62.5	33	14;111	y	0.31	23	51.5	23	9;94	y	0.0238129	6.36396	up	ENSG00000204778.4	RP11-15J10.1	chr9	unprocessed_pseudogene		--
novel_NIR_42628	chr9	65731867	65733510	+	65731867;65733122	65732993;65733510	ES	ENST00000382405.7	novel	0.08	11	128	11	150;106	n	0.1	14	128.5	14	146;111	n	0.21	32	123.5	32	162;85	y	0.18	26	121.5	26	149;94	y	0.0384207	5.82435	up	ENSG00000147996.16	CBWD5	chr9	protein_coding	COBW domain containing 5
novel_NIR_42806	chr9	88388538;88418951	88418850;88426382	+	88388538	88426382	cassetteExon	ENST00000375859.3	novel	0.18	20.5	94	0;41	94	n	0.19	29.5	128	6;53	128	y	0.27	39	104	7;71	104	y	0.25	36	109	8;64	109	y	0.0445338	6.7082	up	ENSG00000106723.16	SPIN1	chr9	protein_coding	spindlin 1
novel_NIR_43092	chrX	101623430	101623814	+	101623430	101623786	A3SS	ENST00000537169.1	novel	1	3	0	3	0	y	0.8	4	1	4	1	y	0.08	1	12	1	12	n	0	0	24	0	24	n	0.0452056	-7.9849	down	ENSG00000102401.19	ARMCX3	chrX	protein_coding	armadillo repeat containing, X-linked 3
novel_NIR_43206	chrX	108568821;108570795	108570649;108571413	+	108568821	108571413	cassetteExon	ENST00000328300.10	novel	0.17	11.5	58	7;16	58	y	0.19	20	85	23;17	85	y	0.09	7.5	80	11;4	80	n	0.08	5	54	8;2	54	n	0.0316556	-8.49706	down	ENSG00000188153.12	COL4A5	chrX	protein_coding	collagen, type IV, alpha 5
novel_NIR_43354	chrX	130349345	130358640	+	130349345;130350731	130350646;130358640	ES	ENST00000612248.4	novel	0.38	17	27.5	17	22;33	y	0.4	29	43.5	29	33;54	y	0.46	31	36	31	22;50	y	0.47	23	26	23	10;42	y	0.0445338	6.7082	up	ENSG00000102078.15	SLC25A14	chrX	protein_coding	solute carrier family 25 (mitochondrial carrier, brain), member 14
novel_NIR_43647	chrX	153794422	153794674	+	153794334	153794674	A5SS	ENST00000370087.5	novel	1	1	0	1	0	n	0.83	5	1	5	1	y	0.11	1	8	1	8	n	0	0	6	0	6	n	0.0212336	-8.49447	down	ENSG00000180879.13	SSR4	chrX	protein_coding	signal sequence receptor, delta
